# Supplementary material for: Digital circuits and neural networks based on acid-base chemistry implemented by robotic fluid handling
Source: PubMed Central journal article supplement (PMC9887006; doi:10.1038/s41467-023-36206-8), 2023-01-30
Supplement: 41467_2023_36206_MOESM1_ESM.pdf [file 41467_2023_36206_MOESM1_ESM.pdf]

## Supplementary Information

### Digital Circuits and Neural Networks based on Acid-Base Chemistry implemented by Robotic Fluid Handling

Ahmed A. Agiza<sup>1\*</sup>, Kady Oakley<sup>1</sup>, Jacob K. Rosenstein<sup>1</sup>, Brenda  
M. Rubenstein<sup>1</sup>, Eunsuk Kim<sup>1</sup>, Marc Riedel<sup>2</sup>, and Sherief Reda<sup>1</sup>

<sup>1</sup>Brown University, Providence, RI, USA

<sup>2</sup>University of Minnesota, Minneapolis, MN, USA

\*ahmed\_agiza@brown.edu

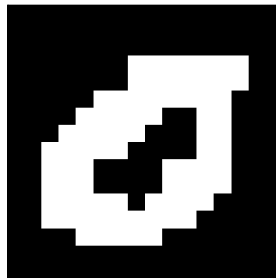

**Supplementary Figure 1:** An  $8 \times 8$  example image that results in the wrong classification using acid-base computations. The *in-silico* model generates scores of  $\{4.0, 2.0\}$  (before the softmax); consequently, the acid-base model generates pH values of  $\{(2.2, 11.8), (2.51, 11.49)\}$ , which is correct but indistinguishable by color only.



**a**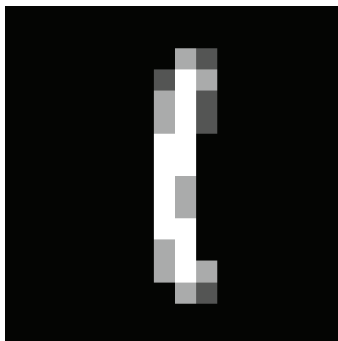**b**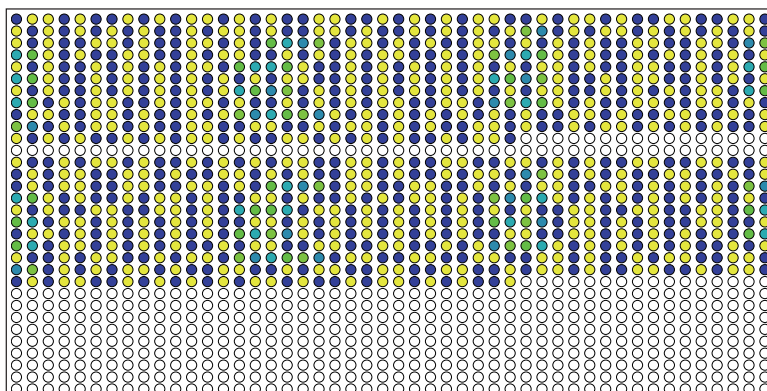

**Supplementary Figure 2:** Encoding of grayscale image using acid-base dual-rail encoding. **a** Grayscale encoded image to be classified. **b** Encoded image using acids (yellow) and bases (blue). The color intensity and shade of each well correspond to the level of the dilution based on the encoded value following to the pH scale colors shown in Figure 1b.

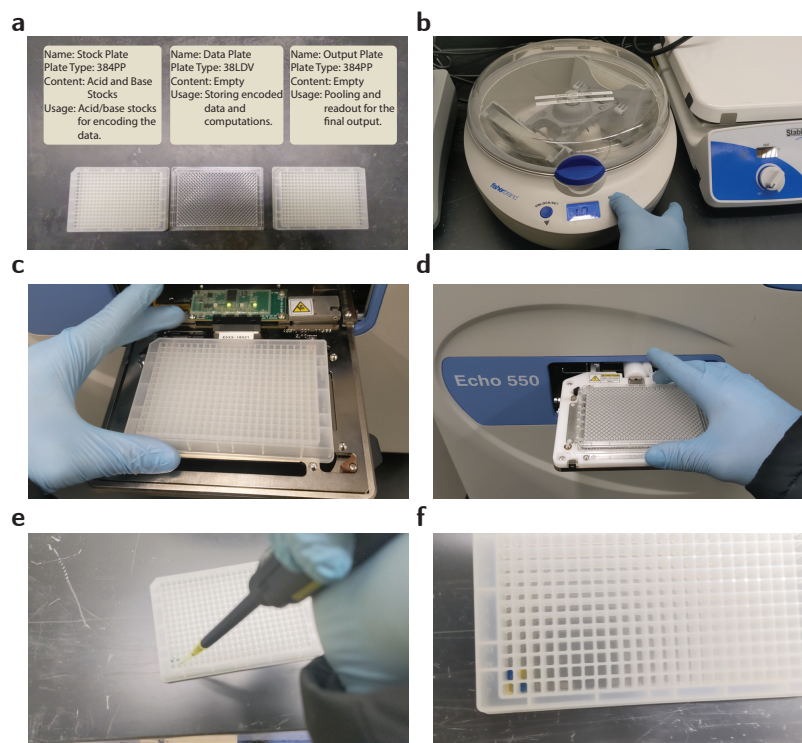

**Supplementary Figure 3:** Working Setup of the Classification of an  $8 \times 8$  image. **a** The three plates used for running the experiment. **b** Centrifuging the stock plate. **c** Inserting the stock plate and the data plate into the liquid handler, after which we start the encoding protocol. **d** Retrieving the data plate, followed by centrifugation. Similarly, we insert the data plate and the output plate into the liquid handler, after which we start the pooling protocol. **e** Adding the pH indicator to the pooling plate, followed by centrifugation. **f** Final readout of the network's classification.

## Supplementary Note 1. Simulation of Digit Classifier on Microfluidic Board OpenDrop v4

In order to demonstrate that our approach can work on different platforms, we designed a simulation for a similar experiment on OpenDrop v4 [1], a digital microfluidics platform that uses electro-wetting technology and is more affordable than the acoustic liquid handler. The board has a 14x8 grid, which we used to encode a 7x7 image with the weights applied as previously described. The simulation then combines the droplets from the positive side of the dual-rail and moves the output to the lower-left cell of the grid, which represents the positive part of the dual-rail neuron's output. Similarly, the negative sides of the dual-rail are combined and moved to the lower-right corner, which represents the negative part of the dual-rail neuron's output. The final output is shown as the pH/color of the dual-pair of the droplet in the lower-left corner of the grid and the droplet in the lower-right corner, where acid-base would indicate +1, and base-acid would indicate -1/0. Supplementary Figure 4 shows the first instance of the simulation with the encoded image and the last instance of the simulation after collecting the results of one neuron. We also ran a full digital logic gate on the physical board, but due to limitations on the volume of the liquid the board can handle, it was not feasible to run the full classification.

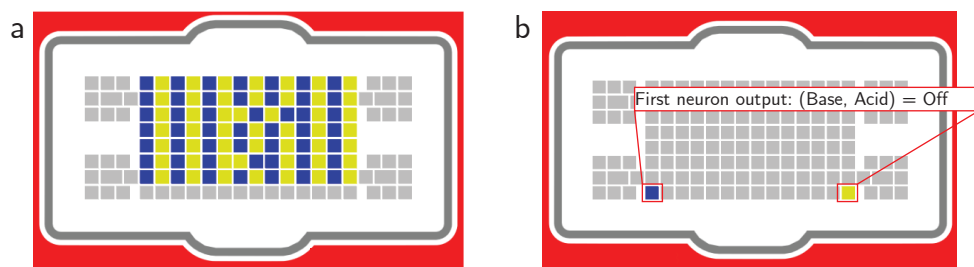

**Supplementary Figure 4:** Simulation of the Digit Classifier on a Microfluidic Device **a** The encoding of a  $7 \times 7$  image of the digit one using acids (yellow) and bases (blue) with network weights applied on a microfluidic device grid. **b** The final output of the microfluidic simulation of one neuron.

**Supplementary Table 2:** Weights of neuron 0 in 2-class binary  $8 \times 8$  image classification.

| <b>Index</b> | <b>0</b> | <b>1</b> | <b>2</b> | <b>3</b> | <b>4</b> | <b>5</b> | <b>6</b> | <b>7</b> |
|--------------|----------|----------|----------|----------|----------|----------|----------|----------|
| <b>0</b>     | -1       | 1        | -1       | 1        | -1       | -1       | 1        | -1       |
| <b>1</b>     | -1       | -1       | -1       | 1        | 1        | 1        | -1       | 1        |
| <b>2</b>     | 1        | -1       | 1        | 1        | 1        | 1        | 1        | -1       |
| <b>3</b>     | -1       | 1        | 1        | 1        | -1       | 1        | 1        | 1        |
| <b>4</b>     | -1       | 1        | 1        | -1       | -1       | 1        | 1        | -1       |
| <b>5</b>     | 1        | 1        | 1        | -1       | -1       | 1        | 1        | -1       |
| <b>6</b>     | 1        | 1        | 1        | 1        | 1        | 1        | -1       | 1        |
| <b>7</b>     | -1       | 1        | 1        | -1       | 1        | -1       | -1       | -1       |

**Supplementary Table 3:** Weights of neuron 1 in 2-class binary  $8 \times 8$  image classification.

| <b>Index</b> | <b>0</b> | <b>1</b> | <b>2</b> | <b>3</b> | <b>4</b> | <b>5</b> | <b>6</b> | <b>7</b> |
|--------------|----------|----------|----------|----------|----------|----------|----------|----------|
| <b>0</b>     | 1        | -1       | -1       | 1        | -1       | 1        | 1        | -1       |
| <b>1</b>     | 1        | 1        | -1       | -1       | -1       | -1       | 1        | -1       |
| <b>2</b>     | 1        | -1       | -1       | -1       | -1       | -1       | -1       | -1       |
| <b>3</b>     | 1        | -1       | -1       | -1       | 1        | -1       | -1       | -1       |
| <b>4</b>     | 1        | -1       | -1       | -1       | 1        | -1       | -1       | -1       |
| <b>5</b>     | -1       | -1       | -1       | 1        | -1       | -1       | -1       | 1        |
| <b>6</b>     | -1       | -1       | -1       | -1       | -1       | -1       | 1        | 1        |
| <b>7</b>     | 1        | -1       | 1        | -1       | 1        | -1       | 1        | 1        |



**Supplementary Table 4:** Weights of neuron 0 in 2-class binary  $12 \times 12$  image classification.

| <b>Index</b> | <b>0</b> | <b>1</b> | <b>2</b> | <b>3</b> | <b>4</b> | <b>5</b> | <b>6</b> | <b>7</b> | <b>8</b> | <b>9</b> | <b>10</b> | <b>11</b> |
|--------------|----------|----------|----------|----------|----------|----------|----------|----------|----------|----------|-----------|-----------|
| <b>0</b>     | -1       | 1        | -1       | -1       | -1       | 1        | 1        | 1        | -1       | -1       | -1        | 1         |
| <b>1</b>     | 1        | 1        | 1        | -1       | -1       | -1       | -1       | -1       | -1       | 1        | -1        | -1        |
| <b>2</b>     | 1        | 1        | -1       | 1        | -1       | 1        | -1       | 1        | 1        | -1       | 1         | -1        |
| <b>3</b>     | 1        | 1        | -1       | 1        | 1        | 1        | 1        | 1        | 1        | 1        | -1        | -1        |
| <b>4</b>     | -1       | -1       | -1       | 1        | 1        | 1        | -1       | -1       | 1        | 1        | 1         | -1        |
| <b>5</b>     | 1        | -1       | 1        | 1        | 1        | -1       | -1       | -1       | 1        | 1        | 1         | 1         |
| <b>6</b>     | -1       | -1       | 1        | 1        | 1        | -1       | -1       | -1       | 1        | 1        | -1        | 1         |
| <b>7</b>     | 1        | -1       | 1        | 1        | 1        | -1       | -1       | 1        | 1        | 1        | 1         | 1         |
| <b>8</b>     | -1       | -1       | 1        | 1        | 1        | -1       | 1        | 1        | 1        | -1       | 1         | -1        |
| <b>9</b>     | 1        | 1        | 1        | 1        | 1        | 1        | 1        | 1        | -1       | -1       | -1        | -1        |
| <b>10</b>    | -1       | -1       | -1       | -1       | 1        | 1        | -1       | 1        | -1       | -1       | -1        | -1        |
| <b>11</b>    | -1       | -1       | 1        | 1        | 1        | 1        | -1       | -1       | 1        | 1        | -1        | 1         |

**Supplementary Table 5:** Weights of neuron 1 in 2-class binary  $12 \times 12$  image classification.

| <b>Index</b> | <b>0</b> | <b>1</b> | <b>2</b> | <b>3</b> | <b>4</b> | <b>5</b> | <b>6</b> | <b>7</b> | <b>8</b> | <b>9</b> | <b>10</b> | <b>11</b> |
|--------------|----------|----------|----------|----------|----------|----------|----------|----------|----------|----------|-----------|-----------|
| <b>0</b>     | -1       | 1        | -1       | -1       | 1        | 1        | 1        | 1        | 1        | 1        | 1         | -1        |
| <b>1</b>     | 1        | -1       | -1       | 1        | 1        | 1        | 1        | -1       | -1       | 1        | -1        | -1        |
| <b>2</b>     | -1       | 1        | -1       | -1       | -1       | -1       | -1       | -1       | 1        | 1        | -1        | 1         |
| <b>3</b>     | 1        | -1       | 1        | 1        | -1       | -1       | -1       | -1       | -1       | -1       | -1        | 1         |
| <b>4</b>     | -1       | 1        | 1        | -1       | -1       | -1       | 1        | -1       | -1       | -1       | 1         | 1         |
| <b>5</b>     | 1        | -1       | -1       | -1       | -1       | -1       | 1        | -1       | -1       | -1       | -1        | -1        |
| <b>6</b>     | -1       | -1       | -1       | -1       | -1       | 1        | 1        | -1       | -1       | -1       | -1        | -1        |
| <b>7</b>     | -1       | 1        | -1       | -1       | -1       | 1        | 1        | -1       | -1       | -1       | -1        | -1        |
| <b>8</b>     | -1       | -1       | -1       | -1       | -1       | 1        | -1       | -1       | -1       | -1       | -1        | 1         |
| <b>9</b>     | 1        | -1       | 1        | -1       | -1       | -1       | -1       | -1       | 1        | 1        | -1        | -1        |
| <b>10</b>    | 1        | -1       | 1        | 1        | 1        | -1       | 1        | 1        | -1       | 1        | -1        | 1         |
| <b>11</b>    | 1        | 1        | 1        | -1       | 1        | -1       | 1        | 1        | -1       | -1       | 1         | -1        |

**Supplementary Table 6:** Weights of neuron 0 in 2-class binary  $16 \times 16$  image classification.

| Index | 0  | 1  | 2  | 3  | 4  | 5  | 6  | 7  | 8  | 9  | 10 | 11 | 12 | 13 | 14 | 15 |
|-------|----|----|----|----|----|----|----|----|----|----|----|----|----|----|----|----|
| 0     | -1 | -1 | 1  | -1 | -1 | 1  | -1 | -1 | -1 | 1  | -1 | 1  | -1 | 1  | 1  | 1  |
| 1     | -1 | -1 | -1 | 1  | -1 | -1 | -1 | -1 | -1 | -1 | -1 | 1  | -1 | 1  | 1  | 1  |
| 2     | -1 | -1 | -1 | -1 | 1  | -1 | -1 | 1  | -1 | -1 | 1  | -1 | -1 | -1 | 1  | 1  |
| 3     | 1  | -1 | -1 | -1 | 1  | 1  | 1  | 1  | 1  | 1  | -1 | 1  | -1 | -1 | -1 | 1  |
| 4     | 1  | 1  | -1 | 1  | -1 | 1  | 1  | 1  | -1 | 1  | 1  | 1  | 1  | 1  | -1 | -1 |
| 5     | 1  | 1  | 1  | 1  | 1  | -1 | 1  | 1  | 1  | 1  | 1  | 1  | 1  | 1  | 1  | -1 |
| 6     | 1  | 1  | 1  | -1 | -1 | 1  | 1  | -1 | -1 | -1 | 1  | 1  | 1  | 1  | 1  | 1  |
| 7     | -1 | 1  | 1  | 1  | 1  | 1  | 1  | -1 | -1 | -1 | -1 | 1  | 1  | 1  | 1  | -1 |
| 8     | -1 | -1 | 1  | 1  | 1  | 1  | 1  | -1 | -1 | -1 | -1 | 1  | 1  | 1  | 1  | -1 |
| 9     | 1  | -1 | 1  | 1  | 1  | 1  | -1 | -1 | -1 | -1 | 1  | 1  | 1  | 1  | -1 | -1 |
| 10    | -1 | -1 | -1 | 1  | 1  | 1  | 1  | -1 | -1 | 1  | 1  | 1  | -1 | 1  | -1 | -1 |
| 11    | -1 | 1  | 1  | 1  | 1  | 1  | 1  | -1 | 1  | 1  | 1  | 1  | -1 | 1  | 1  | 1  |
| 12    | 1  | -1 | -1 | 1  | 1  | 1  | 1  | 1  | 1  | 1  | -1 | -1 | -1 | -1 | -1 | -1 |
| 13    | 1  | 1  | -1 | -1 | 1  | 1  | 1  | 1  | 1  | -1 | -1 | -1 | -1 | 1  | 1  | -1 |
| 14    | 1  | 1  | 1  | -1 | 1  | -1 | -1 | 1  | -1 | 1  | -1 | 1  | 1  | 1  | -1 | 1  |
| 15    | -1 | -1 | -1 | -1 | -1 | -1 | 1  | -1 | 1  | -1 | 1  | -1 | -1 | 1  | 1  | -1 |

**Supplementary Table 7:** Weights of neuron 1 in 2-class binary  $16 \times 16$  image classification.

| Index | 0  | 1  | 2  | 3  | 4  | 5  | 6  | 7  | 8  | 9  | 10 | 11 | 12 | 13 | 14 | 15 |
|-------|----|----|----|----|----|----|----|----|----|----|----|----|----|----|----|----|
| 0     | -1 | 1  | 1  | 1  | -1 | 1  | -1 | 1  | 1  | -1 | 1  | 1  | -1 | 1  | -1 | 1  |
| 1     | -1 | 1  | -1 | 1  | -1 | -1 | -1 | 1  | -1 | 1  | -1 | -1 | 1  | -1 | -1 | 1  |
| 2     | 1  | -1 | 1  | 1  | 1  | 1  | 1  | -1 | 1  | -1 | 1  | -1 | 1  | -1 | -1 | -1 |
| 3     | 1  | 1  | -1 | 1  | -1 | 1  | -1 | -1 | -1 | -1 | -1 | 1  | -1 | 1  | -1 | -1 |
| 4     | -1 | 1  | -1 | 1  | -1 | -1 | -1 | -1 | -1 | -1 | -1 | -1 | -1 | -1 | 1  | -1 |
| 5     | -1 | 1  | 1  | 1  | -1 | 1  | -1 | -1 | -1 | 1  | -1 | -1 | -1 | -1 | -1 | 1  |
| 6     | -1 | 1  | -1 | -1 | -1 | -1 | -1 | -1 | 1  | 1  | -1 | -1 | -1 | -1 | -1 | 1  |
| 7     | 1  | 1  | -1 | -1 | -1 | -1 | -1 | 1  | 1  | 1  | -1 | -1 | -1 | -1 | 1  | 1  |
| 8     | -1 | 1  | -1 | -1 | -1 | -1 | -1 | 1  | 1  | -1 | -1 | -1 | -1 | -1 | -1 | -1 |
| 9     | 1  | -1 | 1  | -1 | -1 | -1 | -1 | 1  | 1  | -1 | -1 | -1 | -1 | -1 | -1 | 1  |
| 10    | 1  | 1  | -1 | -1 | -1 | -1 | -1 | 1  | 1  | -1 | -1 | -1 | 1  | -1 | -1 | -1 |
| 11    | -1 | -1 | 1  | -1 | -1 | -1 | -1 | -1 | -1 | -1 | -1 | -1 | 1  | -1 | -1 | -1 |
| 12    | -1 | 1  | -1 | -1 | 1  | -1 | -1 | 1  | -1 | -1 | -1 | 1  | 1  | 1  | -1 | 1  |
| 13    | 1  | -1 | -1 | 1  | -1 | -1 | -1 | -1 | -1 | 1  | 1  | -1 | 1  | -1 | 1  | -1 |
| 14    | 1  | -1 | 1  | 1  | 1  | 1  | 1  | -1 | -1 | -1 | 1  | -1 | 1  | 1  | -1 | 1  |
| 15    | 1  | -1 | 1  | -1 | 1  | 1  | -1 | 1  | -1 | -1 | -1 | -1 | 1  | -1 | -1 | -1 |

**Supplementary Table 8:** Weights of neuron 0 in 2-class binary  $28 \times 28$  image classification.

| Index | 0  | 1  | 2  | 3  | 4  | 5  | 6  | 7  | 8  | 9  | 10 | 11 | 12 | 13 | 14 | 15 | 16 | 17 | 18 | 19 | 20 | 21 | 22 | 23 | 24 | 25 | 26 | 27 |    |
|-------|----|----|----|----|----|----|----|----|----|----|----|----|----|----|----|----|----|----|----|----|----|----|----|----|----|----|----|----|----|
| 0     | 1  | -1 | 1  | -1 | -1 | -1 | -1 | 1  | 1  | 1  | -1 | 1  | -1 | 1  | 1  | -1 | 1  | -1 | -1 | -1 | 1  | 1  | -1 | -1 | -1 | 1  | -1 | -1 |    |
| 1     | 1  | -1 | -1 | -1 | 1  | -1 | 1  | -1 | 1  | -1 | 1  | -1 | -1 | 1  | -1 | -1 | -1 | -1 | -1 | 1  | 1  | 1  | -1 | -1 | 1  | -1 | -1 | -1 |    |
| 2     | -1 | -1 | 1  | -1 | -1 | -1 | 1  | -1 | 1  | -1 | -1 | -1 | 1  | -1 | -1 | -1 | -1 | -1 | 1  | 1  | -1 | -1 | 1  | -1 | -1 | 1  | 1  | -1 |    |
| 3     | -1 | -1 | 1  | -1 | 1  | -1 | 1  | -1 | -1 | 1  | 1  | -1 | 1  | 1  | -1 | -1 | -1 | -1 | 1  | -1 | -1 | 1  | 1  | 1  | -1 | 1  | -1 | -1 |    |
| 4     | 1  | 1  | -1 | 1  | 1  | -1 | -1 | 1  | 1  | -1 | -1 | -1 | -1 | 1  | -1 | 1  | -1 | -1 | -1 | 1  | -1 | -1 | -1 | -1 | -1 | 1  | -1 | -1 |    |
| 5     | -1 | 1  | 1  | -1 | 1  | -1 | -1 | -1 | -1 | -1 | 1  | 1  | 1  | -1 | 1  | -1 | -1 | 1  | 1  | -1 | 1  | 1  | -1 | -1 | -1 | -1 | -1 | 1  | 1  |
| 6     | -1 | 1  | 1  | -1 | 1  | 1  | -1 | 1  | -1 | 1  | 1  | 1  | -1 | -1 | 1  | 1  | 1  | -1 | 1  | -1 | 1  | -1 | -1 | 1  | 1  | 1  | 1  | 1  | -1 |
| 7     | 1  | -1 | 1  | 1  | 1  | 1  | -1 | -1 | -1 | 1  | 1  | 1  | 1  | 1  | 1  | -1 | 1  | 1  | 1  | 1  | 1  | -1 | -1 | 1  | -1 | 1  | -1 | 1  | 1  |
| 8     | 1  | 1  | 1  | -1 | -1 | -1 | -1 | -1 | -1 | 1  | -1 | 1  | 1  | -1 | -1 | 1  | -1 | 1  | 1  | 1  | 1  | 1  | 1  | 1  | 1  | 1  | -1 | -1 | 1  |
| 9     | 1  | 1  | 1  | 1  | -1 | 1  | 1  | -1 | 1  | -1 | -1 | 1  | -1 | -1 | 1  | -1 | -1 | 1  | -1 | 1  | 1  | 1  | 1  | 1  | -1 | -1 | 1  | 1  | 1  |
| 10    | -1 | 1  | 1  | -1 | 1  | -1 | -1 | -1 | -1 | 1  | 1  | 1  | 1  | -1 | -1 | -1 | -1 | 1  | -1 | 1  | 1  | 1  | 1  | 1  | 1  | 1  | -1 | 1  | -1 |
| 11    | 1  | -1 | 1  | 1  | -1 | 1  | -1 | -1 | 1  | 1  | -1 | 1  | 1  | -1 | -1 | -1 | -1 | 1  | 1  | 1  | 1  | 1  | 1  | 1  | 1  | -1 | 1  | 1  | 1  |
| 12    | -1 | -1 | -1 | 1  | -1 | -1 | -1 | 1  | 1  | 1  | 1  | 1  | -1 | -1 | -1 | -1 | -1 | -1 | 1  | 1  | 1  | 1  | 1  | 1  | 1  | -1 | 1  | 1  | -1 |
| 13    | -1 | 1  | 1  | -1 | 1  | 1  | 1  | 1  | 1  | 1  | 1  | 1  | -1 | -1 | 1  | -1 | -1 | -1 | -1 | 1  | 1  | 1  | 1  | 1  | 1  | 1  | 1  | -1 | 1  |
| 14    | 1  | -1 | -1 | -1 | 1  | 1  | -1 | 1  | 1  | 1  | 1  | 1  | -1 | -1 | -1 | -1 | -1 | -1 | 1  | 1  | 1  | 1  | 1  | 1  | 1  | 1  | 1  | -1 | 1  |
| 15    | 1  | -1 | 1  | -1 | -1 | 1  | 1  | -1 | 1  | 1  | 1  | 1  | -1 | -1 | -1 | -1 | -1 | 1  | 1  | 1  | 1  | 1  | 1  | 1  | 1  | 1  | 1  | 1  | -1 |
| 16    | 1  | -1 | -1 | 1  | 1  | 1  | 1  | 1  | 1  | 1  | 1  | -1 | 1  | 1  | -1 | -1 | 1  | 1  | 1  | 1  | 1  | 1  | 1  | 1  | -1 | 1  | 1  | 1  | 1  |
| 17    | -1 | -1 | -1 | -1 | 1  | 1  | 1  | 1  | 1  | 1  | 1  | -1 | -1 | -1 | -1 | 1  | -1 | 1  | 1  | 1  | 1  | 1  | 1  | 1  | 1  | -1 | 1  | -1 | -1 |
| 18    | -1 | -1 | 1  | 1  | 1  | 1  | -1 | 1  | 1  | -1 | 1  | -1 | -1 | -1 | 1  | -1 | 1  | 1  | 1  | 1  | 1  | -1 | 1  | 1  | 1  | -1 | -1 | -1 | -1 |
| 19    | 1  | 1  | 1  | 1  | 1  | 1  | 1  | 1  | 1  | 1  | -1 | 1  | 1  | -1 | -1 | -1 | -1 | 1  | 1  | -1 | 1  | 1  | 1  | -1 | 1  | 1  | 1  | 1  | -1 |
| 20    | -1 | -1 | -1 | 1  | 1  | 1  | -1 | 1  | 1  | 1  | 1  | 1  | -1 | 1  | -1 | 1  | 1  | -1 | 1  | 1  | -1 | -1 | 1  | -1 | 1  | 1  | 1  | 1  | -1 |
| 21    | 1  | -1 | 1  | -1 | -1 | -1 | -1 | 1  | -1 | -1 | 1  | 1  | 1  | 1  | 1  | -1 | -1 | 1  | 1  | -1 | -1 | -1 | -1 | -1 | -1 | -1 | 1  | -1 | -1 |
| 22    | -1 | -1 | 1  | -1 | 1  | -1 | -1 | 1  | 1  | -1 | 1  | 1  | 1  | 1  | -1 | 1  | -1 | 1  | -1 | -1 | 1  | -1 | 1  | 1  | 1  | 1  | 1  | 1  | -1 |
| 23    | 1  | -1 | -1 | -1 | -1 | 1  | -1 | -1 | 1  | 1  | 1  | 1  | 1  | 1  | -1 | 1  | -1 | 1  | -1 | 1  | 1  | -1 | -1 | 1  | 1  | 1  | 1  | -1 | 1  |
| 24    | 1  | -1 | -1 | 1  | -1 | 1  | -1 | 1  | -1 | -1 | -1 | -1 | -1 | 1  | 1  | -1 | -1 | 1  | 1  | -1 | -1 | -1 | -1 | 1  | -1 | 1  | 1  | -1 | -1 |
| 25    | 1  | -1 | 1  | -1 | -1 | -1 | -1 | -1 | -1 | -1 | 1  | -1 | -1 | -1 | -1 | 1  | -1 | 1  | 1  | -1 | -1 | -1 | 1  | 1  | -1 | -1 | -1 | 1  | -1 |
| 26    | -1 | -1 | -1 | -1 | -1 | 1  | 1  | -1 | 1  | -1 | -1 | 1  | -1 | -1 | -1 | -1 | 1  | 1  | 1  | -1 | -1 | 1  | 1  | -1 | -1 | -1 | -1 | -1 | -1 |
| 27    | -1 | -1 | 1  | -1 | 1  | -1 | 1  | 1  | -1 | 1  | -1 | -1 | 1  | 1  | -1 | -1 | -1 | -1 | -1 | 1  | 1  | 1  | 1  | -1 | 1  | -1 | -1 | -1 | -1 |

**Supplementary Table 9:** Weights of neuron 1 in 2-class binary  $28 \times 28$  image classification.

| Index | 0  | 1  | 2  | 3  | 4  | 5  | 6  | 7  | 8  | 9  | 10 | 11 | 12 | 13 | 14 | 15 | 16 | 17 | 18 | 19 | 20 | 21 | 22 | 23 | 24 | 25 | 26 | 27 |
|-------|----|----|----|----|----|----|----|----|----|----|----|----|----|----|----|----|----|----|----|----|----|----|----|----|----|----|----|----|
| 0     | 1  | -1 | 1  | -1 | 1  | 1  | -1 | -1 | -1 | 1  | 1  | 1  | -1 | -1 | 1  | -1 | -1 | -1 | -1 | 1  | -1 | 1  | 1  | -1 | -1 | 1  | 1  | -1 |
| 1     | 1  | 1  | -1 | 1  | 1  | 1  | -1 | -1 | 1  | -1 | 1  | -1 | -1 | 1  | 1  | 1  | 1  | -1 | 1  | 1  | 1  | -1 | -1 | -1 | -1 | 1  | -1 | -1 |
| 2     | 1  | -1 | 1  | 1  | 1  | 1  | 1  | 1  | -1 | 1  | -1 | 1  | 1  | -1 | -1 | 1  | -1 | 1  | -1 | -1 | 1  | 1  | -1 | -1 | -1 | -1 | -1 | -1 |
| 3     | 1  | 1  | -1 | 1  | -1 | 1  | -1 | 1  | -1 | 1  | 1  | 1  | -1 | 1  | 1  | -1 | -1 | 1  | 1  | 1  | -1 | -1 | 1  | 1  | 1  | -1 | -1 | 1  |
| 4     | -1 | 1  | -1 | 1  | 1  | 1  | -1 | -1 | -1 | 1  | 1  | -1 | 1  | 1  | -1 | 1  | 1  | -1 | -1 | 1  | -1 | 1  | 1  | -1 | 1  | -1 | 1  | 1  |
| 5     | -1 | -1 | -1 | 1  | -1 | 1  | 1  | -1 | -1 | 1  | 1  | 1  | -1 | -1 | 1  | 1  | -1 | -1 | 1  | -1 | 1  | 1  | -1 | 1  | -1 | 1  | -1 | -1 |
| 6     | 1  | -1 | 1  | 1  | -1 | 1  | 1  | 1  | -1 | 1  | 1  | -1 | 1  | -1 | -1 | 1  | -1 | -1 | -1 | -1 | 1  | -1 | 1  | 1  | -1 | -1 | -1 | -1 |
| 7     | -1 | -1 | 1  | 1  | 1  | -1 | 1  | 1  | -1 | 1  | -1 | 1  | -1 | -1 | 1  | 1  | -1 | -1 | -1 | -1 | -1 | -1 | 1  | -1 | -1 | 1  | 1  | 1  |
| 8     | 1  | 1  | -1 | 1  | 1  | 1  | 1  | -1 | -1 | -1 | -1 | -1 | -1 | -1 | 1  | 1  | -1 | 1  | -1 | 1  | -1 | -1 | -1 | -1 | 1  | 1  | -1 | -1 |
| 9     | 1  | 1  | 1  | 1  | 1  | 1  | -1 | 1  | -1 | -1 | -1 | -1 | -1 | 1  | -1 | 1  | -1 | 1  | -1 | -1 | -1 | -1 | 1  | 1  | 1  | -1 | -1 | 1  |
| 10    | -1 | -1 | -1 | 1  | -1 | -1 | 1  | -1 | -1 | 1  | 1  | -1 | -1 | -1 | -1 | 1  | 1  | -1 | 1  | -1 | -1 | -1 | -1 | 1  | -1 | 1  | 1  | -1 |
| 11    | -1 | 1  | -1 | -1 | -1 | -1 | -1 | -1 | -1 | -1 | -1 | -1 | -1 | -1 | 1  | 1  | 1  | -1 | -1 | -1 | -1 | -1 | 1  | -1 | -1 | -1 | -1 | 1  |
| 12    | -1 | 1  | -1 | 1  | 1  | -1 | -1 | -1 | -1 | -1 | -1 | -1 | -1 | 1  | 1  | 1  | 1  | -1 | -1 | -1 | -1 | 1  | -1 | -1 | -1 | -1 | 1  | -1 |
| 13    | -1 | 1  | 1  | -1 | -1 | 1  | -1 | -1 | -1 | -1 | -1 | -1 | -1 | 1  | 1  | 1  | -1 | 1  | -1 | -1 | 1  | -1 | -1 | -1 | -1 | -1 | -1 | 1  |
| 14    | 1  | 1  | -1 | 1  | 1  | 1  | -1 | -1 | -1 | -1 | -1 | -1 | -1 | 1  | 1  | 1  | 1  | -1 | -1 | -1 | -1 | -1 | -1 | -1 | -1 | 1  | -1 | -1 |
| 15    | 1  | -1 | -1 | 1  | 1  | -1 | -1 | -1 | -1 | -1 | -1 | -1 | -1 | 1  | 1  | 1  | 1  | -1 | -1 | -1 | -1 | -1 | 1  | -1 | -1 | 1  | -1 | -1 |
| 16    | -1 | 1  | -1 | -1 | 1  | -1 | -1 | 1  | -1 | -1 | -1 | -1 | 1  | 1  | 1  | 1  | -1 | -1 | -1 | -1 | -1 | -1 | -1 | -1 | 1  | -1 | 1  | 1  |
| 17    | -1 | -1 | 1  | 1  | -1 | -1 | -1 | -1 | -1 | -1 | -1 | -1 | 1  | -1 | 1  | -1 | 1  | -1 | -1 | -1 | -1 | -1 | 1  | -1 | 1  | -1 | 1  | -1 |
| 18    | 1  | 1  | -1 | 1  | 1  | 1  | -1 | -1 | -1 | -1 | 1  | 1  | 1  | 1  | 1  | 1  | -1 | -1 | -1 | -1 | -1 | -1 | -1 | -1 | -1 | 1  | 1  | 1  |
| 19    | -1 | -1 | 1  | -1 | -1 | -1 | -1 | -1 | -1 | -1 | -1 | 1  | -1 | 1  | 1  | -1 | -1 | -1 | 1  | -1 | 1  | -1 | -1 | -1 | -1 | 1  | 1  | -1 |
| 20    | -1 | 1  | 1  | -1 | 1  | 1  | 1  | 1  | -1 | -1 | -1 | -1 | -1 | -1 | 1  | -1 | -1 | -1 | 1  | 1  | -1 | -1 | -1 | 1  | -1 | 1  | 1  | 1  |
| 21    | -1 | 1  | -1 | -1 | -1 | -1 | 1  | -1 | 1  | 1  | -1 | -1 | 1  | -1 | 1  | -1 | 1  | -1 | 1  | -1 | 1  | 1  | -1 | 1  | -1 | 1  | 1  | 1  |
| 22    | 1  | -1 | 1  | -1 | 1  | -1 | -1 | -1 | 1  | -1 | -1 | 1  | -1 | -1 | 1  | -1 | -1 | 1  | -1 | -1 | 1  | 1  | 1  | 1  | 1  | 1  | -1 | -1 |
| 23    | -1 | 1  | -1 | -1 | 1  | 1  | -1 | 1  | 1  | -1 | -1 | -1 | -1 | -1 | 1  | -1 | 1  | -1 | 1  | -1 | 1  | 1  | 1  | 1  | 1  | -1 | 1  | -1 |
| 24    | -1 | 1  | 1  | 1  | -1 | -1 | 1  | 1  | -1 | -1 | 1  | 1  | -1 | 1  | -1 | 1  | -1 | 1  | -1 | -1 | -1 | -1 | 1  | -1 | -1 | -1 | -1 | -1 |
| 25    | -1 | 1  | 1  | 1  | 1  | 1  | 1  | 1  | 1  | -1 | -1 | 1  | -1 | -1 | 1  | -1 | 1  | 1  | 1  | 1  | -1 | 1  | -1 | -1 | 1  | -1 | 1  | -1 |
| 26    | 1  | 1  | 1  | 1  | 1  | 1  | -1 | 1  | 1  | 1  | -1 | -1 | -1 | -1 | 1  | 1  | 1  | -1 | 1  | -1 | 1  | 1  | 1  | 1  | -1 | -1 | 1  | -1 |
| 27    | -1 | 1  | 1  | 1  | -1 | 1  | -1 | 1  | -1 | -1 | 1  | -1 | -1 | -1 | 1  | -1 | -1 | 1  | -1 | -1 | 1  | -1 | -1 | 1  | 1  | -1 | -1 | -1 |

**Supplementary Table 10:** Weights of neuron 0 in 3-class binary  $8 \times 8$  image classification.

| <b>Index</b> | <b>0</b> | <b>1</b> | <b>2</b> | <b>3</b> | <b>4</b> | <b>5</b> | <b>6</b> | <b>7</b> |
|--------------|----------|----------|----------|----------|----------|----------|----------|----------|
| <b>0</b>     | -1       | -1       | 1        | 1        | -1       | 1        | 1        | -1       |
| <b>1</b>     | -1       | -1       | -1       | -1       | 1        | 1        | 1        | 1        |
| <b>2</b>     | 1        | -1       | 1        | 1        | 1        | 1        | 1        | 1        |
| <b>3</b>     | 1        | 1        | 1        | 1        | -1       | -1       | 1        | 1        |
| <b>4</b>     | -1       | 1        | 1        | -1       | -1       | -1       | 1        | -1       |
| <b>5</b>     | 1        | -1       | 1        | -1       | -1       | 1        | -1       | -1       |
| <b>6</b>     | 1        | -1       | 1        | 1        | 1        | 1        | -1       | 1        |
| <b>7</b>     | -1       | 1        | 1        | -1       | -1       | 1        | 1        | 1        |

**Supplementary Table 11:** Weights of neuron 1 in 3-class binary  $8 \times 8$  image classification.

| <b>Index</b> | <b>0</b> | <b>1</b> | <b>2</b> | <b>3</b> | <b>4</b> | <b>5</b> | <b>6</b> | <b>7</b> |
|--------------|----------|----------|----------|----------|----------|----------|----------|----------|
| <b>0</b>     | 1        | 1        | 1        | -1       | -1       | -1       | 1        | 1        |
| <b>1</b>     | 1        | 1        | -1       | -1       | -1       | 1        | 1        | -1       |
| <b>2</b>     | 1        | -1       | -1       | -1       | 1        | -1       | -1       | 1        |
| <b>3</b>     | 1        | -1       | -1       | 1        | 1        | -1       | -1       | -1       |
| <b>4</b>     | 1        | -1       | -1       | -1       | 1        | -1       | -1       | -1       |
| <b>5</b>     | -1       | -1       | -1       | -1       | -1       | -1       | -1       | -1       |
| <b>6</b>     | 1        | 1        | -1       | 1        | 1        | -1       | -1       | 1        |
| <b>7</b>     | 1        | -1       | 1        | 1        | -1       | 1        | 1        | 1        |



**Supplementary Table 12:** Weights of neuron 2 in 3-class binary  $8 \times 8$  image classification.

| <b>Index</b> | <b>0</b> | <b>1</b> | <b>2</b> | <b>3</b> | <b>4</b> | <b>5</b> | <b>6</b> | <b>7</b> |
|--------------|----------|----------|----------|----------|----------|----------|----------|----------|
| <b>0</b>     | 1        | -1       | 1        | -1       | -1       | 1        | -1       | 1        |
| <b>1</b>     | 1        | 1        | 1        | 1        | 1        | 1        | -1       | 1        |
| <b>2</b>     | 1        | 1        | 1        | -1       | -1       | -1       | -1       | -1       |
| <b>3</b>     | -1       | -1       | -1       | -1       | 1        | 1        | -1       | 1        |
| <b>4</b>     | -1       | 1        | -1       | 1        | 1        | 1        | -1       | 1        |
| <b>5</b>     | 1        | 1        | 1        | 1        | 1        | 1        | 1        | 1        |
| <b>6</b>     | -1       | 1        | 1        | -1       | -1       | 1        | 1        | 1        |
| <b>7</b>     | -1       | -1       | -1       | -1       | 1        | -1       | 1        | -1       |

**Supplementary Table 13:** Weights of neuron 0 in 3-class binary  $12 \times 12$  image classification.

| <b>Index</b> | <b>0</b> | <b>1</b> | <b>2</b> | <b>3</b> | <b>4</b> | <b>5</b> | <b>6</b> | <b>7</b> | <b>8</b> | <b>9</b> | <b>10</b> | <b>11</b> |
|--------------|----------|----------|----------|----------|----------|----------|----------|----------|----------|----------|-----------|-----------|
| <b>0</b>     | 1        | -1       | 1        | -1       | -1       | 1        | -1       | 1        | -1       | -1       | 1         | 1         |
| <b>1</b>     | 1        | 1        | 1        | -1       | -1       | -1       | -1       | -1       | -1       | 1        | -1        | 1         |
| <b>2</b>     | -1       | 1        | -1       | -1       | 1        | -1       | 1        | -1       | 1        | -1       | 1         | -1        |
| <b>3</b>     | 1        | -1       | -1       | -1       | -1       | -1       | 1        | 1        | 1        | 1        | 1         | 1         |
| <b>4</b>     | 1        | 1        | 1        | 1        | 1        | 1        | 1        | 1        | 1        | 1        | 1         | 1         |
| <b>5</b>     | 1        | -1       | 1        | 1        | 1        | 1        | -1       | -1       | 1        | 1        | 1         | -1        |
| <b>6</b>     | 1        | 1        | 1        | 1        | 1        | -1       | -1       | -1       | 1        | 1        | 1         | -1        |
| <b>7</b>     | 1        | -1       | 1        | 1        | -1       | -1       | -1       | -1       | 1        | 1        | -1        | -1        |
| <b>8</b>     | 1        | -1       | -1       | 1        | 1        | -1       | -1       | 1        | -1       | -1       | -1        | -1        |
| <b>9</b>     | 1        | -1       | -1       | -1       | 1        | 1        | 1        | 1        | -1       | -1       | -1        | 1         |
| <b>10</b>    | 1        | 1        | -1       | -1       | 1        | 1        | 1        | 1        | -1       | -1       | 1         | -1        |
| <b>11</b>    | -1       | 1        | 1        | 1        | -1       | 1        | -1       | 1        | 1        | -1       | 1         | 1         |

**Supplementary Table 14:** Weights of neuron 1 in 3-class binary  $12 \times 12$  image classification.

| <b>Index</b> | <b>0</b> | <b>1</b> | <b>2</b> | <b>3</b> | <b>4</b> | <b>5</b> | <b>6</b> | <b>7</b> | <b>8</b> | <b>9</b> | <b>10</b> | <b>11</b> |
|--------------|----------|----------|----------|----------|----------|----------|----------|----------|----------|----------|-----------|-----------|
| <b>0</b>     | 1        | 1        | 1        | 1        | -1       | 1        | -1       | -1       | 1        | 1        | 1         | -1        |
| <b>1</b>     | 1        | 1        | -1       | -1       | -1       | -1       | -1       | -1       | 1        | -1       | 1         | 1         |
| <b>2</b>     | -1       | -1       | -1       | -1       | -1       | -1       | -1       | -1       | 1        | 1        | 1         | 1         |
| <b>3</b>     | 1        | 1        | -1       | -1       | -1       | -1       | -1       | -1       | 1        | -1       | 1         | 1         |
| <b>4</b>     | 1        | 1        | -1       | -1       | -1       | 1        | 1        | -1       | -1       | -1       | -1        | -1        |
| <b>5</b>     | 1        | -1       | -1       | -1       | -1       | 1        | 1        | -1       | -1       | -1       | 1         | 1         |
| <b>6</b>     | -1       | 1        | -1       | -1       | -1       | 1        | 1        | -1       | -1       | -1       | -1        | -1        |
| <b>7</b>     | -1       | 1        | -1       | -1       | -1       | 1        | 1        | -1       | -1       | -1       | -1        | 1         |
| <b>8</b>     | 1        | -1       | -1       | -1       | -1       | 1        | -1       | -1       | -1       | -1       | -1        | 1         |
| <b>9</b>     | 1        | 1        | 1        | 1        | -1       | 1        | 1        | -1       | -1       | -1       | -1        | 1         |
| <b>10</b>    | 1        | 1        | 1        | 1        | 1        | 1        | 1        | -1       | 1        | -1       | 1         | -1        |
| <b>11</b>    | 1        | -1       | 1        | 1        | 1        | 1        | 1        | 1        | 1        | -1       | 1         | 1         |

**Supplementary Table 15:** Weights of neuron 2 in 3-class binary  $12 \times 12$  image classification.

| <b>Index</b> | <b>0</b> | <b>1</b> | <b>2</b> | <b>3</b> | <b>4</b> | <b>5</b> | <b>6</b> | <b>7</b> | <b>8</b> | <b>9</b> | <b>10</b> | <b>11</b> |
|--------------|----------|----------|----------|----------|----------|----------|----------|----------|----------|----------|-----------|-----------|
| <b>0</b>     | 1        | -1       | -1       | 1        | -1       | 1        | -1       | 1        | 1        | -1       | -1        | -1        |
| <b>1</b>     | -1       | 1        | -1       | 1        | 1        | 1        | 1        | 1        | -1       | 1        | -1        | 1         |
| <b>2</b>     | -1       | -1       | 1        | 1        | 1        | 1        | 1        | 1        | -1       | 1        | -1        | -1        |
| <b>3</b>     | -1       | 1        | 1        | 1        | 1        | 1        | 1        | -1       | -1       | -1       | 1         | -1        |
| <b>4</b>     | 1        | 1        | -1       | -1       | -1       | -1       | -1       | 1        | -1       | -1       | 1         | -1        |
| <b>5</b>     | 1        | 1        | -1       | -1       | -1       | -1       | 1        | 1        | -1       | -1       | -1        | 1         |
| <b>6</b>     | 1        | -1       | -1       | -1       | 1        | 1        | 1        | 1        | 1        | -1       | -1        | 1         |
| <b>7</b>     | 1        | 1        | 1        | 1        | 1        | 1        | 1        | 1        | 1        | 1        | 1         | 1         |
| <b>8</b>     | 1        | 1        | 1        | 1        | 1        | 1        | 1        | 1        | 1        | 1        | 1         | -1        |
| <b>9</b>     | -1       | 1        | 1        | 1        | -1       | -1       | -1       | -1       | 1        | 1        | 1         | -1        |
| <b>10</b>    | 1        | 1        | 1        | -1       | -1       | -1       | 1        | 1        | 1        | 1        | -1        | -1        |
| <b>11</b>    | -1       | -1       | -1       | -1       | -1       | 1        | -1       | 1        | -1       | -1       | -1        | 1         |

**Supplementary Table 16:** Weights of neuron 0 in 3-class binary  $16 \times 16$  image classification.

| Index | 0  | 1  | 2  | 3  | 4  | 5  | 6  | 7  | 8  | 9  | 10 | 11 | 12 | 13 | 14 | 15 |
|-------|----|----|----|----|----|----|----|----|----|----|----|----|----|----|----|----|
| 0     | -1 | -1 | -1 | 1  | 1  | 1  | 1  | 1  | 1  | 1  | 1  | -1 | -1 | -1 | 1  | 1  |
| 1     | 1  | -1 | -1 | 1  | 1  | -1 | -1 | 1  | -1 | -1 | 1  | -1 | -1 | -1 | 1  | 1  |
| 2     | 1  | -1 | 1  | 1  | -1 | 1  | 1  | 1  | 1  | 1  | 1  | -1 | -1 | -1 | -1 | 1  |
| 3     | 1  | 1  | 1  | -1 | -1 | -1 | -1 | -1 | 1  | 1  | -1 | -1 | 1  | 1  | 1  | -1 |
| 4     | -1 | 1  | -1 | -1 | -1 | -1 | -1 | 1  | 1  | 1  | 1  | 1  | -1 | 1  | 1  | 1  |
| 5     | -1 | 1  | -1 | 1  | -1 | 1  | 1  | 1  | 1  | 1  | 1  | 1  | 1  | 1  | -1 | 1  |
| 6     | 1  | 1  | 1  | 1  | 1  | 1  | 1  | 1  | -1 | -1 | 1  | 1  | 1  | 1  | 1  | 1  |
| 7     | 1  | 1  | 1  | 1  | 1  | 1  | 1  | 1  | -1 | -1 | -1 | 1  | 1  | 1  | 1  | -1 |
| 8     | 1  | -1 | 1  | 1  | 1  | 1  | -1 | -1 | -1 | -1 | -1 | 1  | 1  | 1  | 1  | -1 |
| 9     | 1  | -1 | 1  | 1  | 1  | 1  | -1 | -1 | -1 | -1 | -1 | 1  | -1 | -1 | -1 | 1  |
| 10    | 1  | -1 | -1 | -1 | 1  | 1  | -1 | -1 | -1 | -1 | -1 | 1  | 1  | -1 | 1  | 1  |
| 11    | -1 | 1  | -1 | -1 | -1 | 1  | 1  | -1 | -1 | 1  | 1  | 1  | -1 | -1 | -1 | 1  |
| 12    | -1 | -1 | -1 | -1 | -1 | 1  | 1  | 1  | 1  | 1  | 1  | -1 | -1 | -1 | 1  | -1 |
| 13    | 1  | -1 | -1 | -1 | -1 | 1  | 1  | 1  | 1  | 1  | -1 | -1 | -1 | 1  | -1 | -1 |
| 14    | -1 | 1  | -1 | 1  | -1 | -1 | 1  | 1  | 1  | 1  | 1  | -1 | 1  | -1 | 1  | 1  |
| 15    | 1  | -1 | 1  | 1  | 1  | 1  | -1 | 1  | -1 | -1 | -1 | 1  | 1  | 1  | 1  | -1 |

**Supplementary Table 17:** Weights of neuron 1 in 3-class binary  $16 \times 16$  image classification.

| Index | 0  | 1  | 2  | 3  | 4  | 5  | 6  | 7  | 8  | 9  | 10 | 11 | 12 | 13 | 14 | 15 |
|-------|----|----|----|----|----|----|----|----|----|----|----|----|----|----|----|----|
| 0     | 1  | 1  | -1 | 1  | 1  | 1  | -1 | 1  | -1 | 1  | -1 | -1 | 1  | -1 | 1  | 1  |
| 1     | 1  | 1  | 1  | -1 | -1 | -1 | -1 | -1 | -1 | -1 | -1 | 1  | -1 | 1  | -1 | 1  |
| 2     | -1 | 1  | 1  | 1  | -1 | -1 | -1 | -1 | 1  | -1 | 1  | 1  | 1  | 1  | 1  | -1 |
| 3     | 1  | -1 | 1  | -1 | -1 | -1 | -1 | -1 | -1 | -1 | -1 | 1  | 1  | -1 | 1  | 1  |
| 4     | 1  | -1 | 1  | -1 | -1 | -1 | -1 | -1 | -1 | 1  | -1 | -1 | 1  | 1  | 1  | 1  |
| 5     | 1  | -1 | -1 | -1 | -1 | -1 | -1 | 1  | 1  | 1  | -1 | -1 | -1 | -1 | 1  | -1 |
| 6     | 1  | 1  | 1  | -1 | -1 | -1 | -1 | 1  | 1  | -1 | -1 | -1 | -1 | -1 | 1  | 1  |
| 7     | 1  | 1  | 1  | 1  | -1 | -1 | 1  | 1  | 1  | -1 | -1 | -1 | -1 | -1 | -1 | 1  |
| 8     | -1 | 1  | 1  | -1 | -1 | -1 | -1 | 1  | 1  | 1  | -1 | -1 | -1 | -1 | -1 | -1 |
| 9     | 1  | 1  | -1 | -1 | -1 | -1 | -1 | 1  | 1  | -1 | -1 | -1 | -1 | -1 | -1 | 1  |
| 10    | -1 | 1  | 1  | -1 | -1 | -1 | -1 | -1 | 1  | -1 | -1 | -1 | -1 | -1 | -1 | 1  |
| 11    | 1  | 1  | -1 | -1 | -1 | -1 | -1 | 1  | -1 | -1 | -1 | -1 | -1 | -1 | -1 | -1 |
| 12    | 1  | -1 | 1  | -1 | -1 | -1 | -1 | -1 | -1 | -1 | -1 | -1 | -1 | 1  | -1 | -1 |
| 13    | -1 | 1  | 1  | 1  | 1  | 1  | 1  | 1  | 1  | 1  | -1 | -1 | -1 | 1  | 1  | -1 |
| 14    | -1 | 1  | 1  | 1  | 1  | -1 | 1  | 1  | -1 | 1  | -1 | 1  | -1 | 1  | 1  | -1 |
| 15    | 1  | 1  | 1  | 1  | 1  | -1 | -1 | -1 | 1  | -1 | 1  | 1  | -1 | -1 | 1  | 1  |

**Supplementary Table 18:** Weights of neuron 2 in 3-class binary  $16 \times 16$  image classification.

| Index | 0  | 1  | 2  | 3  | 4  | 5  | 6  | 7  | 8  | 9  | 10 | 11 | 12 | 13 | 14 | 15 |
|-------|----|----|----|----|----|----|----|----|----|----|----|----|----|----|----|----|
| 0     | 1  | -1 | -1 | 1  | 1  | 1  | -1 | 1  | -1 | -1 | 1  | -1 | 1  | -1 | -1 | -1 |
| 1     | 1  | 1  | 1  | 1  | -1 | -1 | 1  | 1  | -1 | -1 | -1 | 1  | 1  | 1  | 1  | -1 |
| 2     | -1 | -1 | 1  | -1 | 1  | -1 | 1  | 1  | 1  | 1  | 1  | -1 | -1 | -1 | 1  | -1 |
| 3     | 1  | 1  | -1 | 1  | 1  | 1  | 1  | 1  | 1  | 1  | 1  | -1 | 1  | -1 | 1  | -1 |
| 4     | -1 | 1  | 1  | 1  | 1  | 1  | 1  | 1  | -1 | -1 | -1 | 1  | -1 | 1  | -1 | -1 |
| 5     | 1  | 1  | 1  | 1  | -1 | -1 | -1 | -1 | -1 | -1 | 1  | -1 | -1 | -1 | -1 | -1 |
| 6     | 1  | 1  | -1 | -1 | -1 | -1 | -1 | -1 | -1 | 1  | -1 | -1 | -1 | -1 | 1  | -1 |
| 7     | -1 | -1 | -1 | -1 | -1 | -1 | -1 | -1 | 1  | 1  | 1  | -1 | -1 | -1 | -1 | -1 |
| 8     | 1  | -1 | -1 | -1 | -1 | 1  | 1  | 1  | 1  | 1  | 1  | 1  | -1 | -1 | -1 | 1  |
| 9     | -1 | 1  | 1  | 1  | 1  | 1  | 1  | 1  | 1  | 1  | 1  | -1 | 1  | 1  | 1  | 1  |
| 10    | -1 | -1 | 1  | 1  | 1  | 1  | 1  | 1  | 1  | -1 | 1  | 1  | 1  | 1  | 1  | -1 |
| 11    | 1  | 1  | 1  | 1  | 1  | 1  | 1  | 1  | 1  | 1  | 1  | 1  | 1  | 1  | 1  | -1 |
| 12    | 1  | 1  | 1  | 1  | 1  | -1 | -1 | 1  | -1 | -1 | 1  | 1  | 1  | 1  | 1  | 1  |
| 13    | 1  | 1  | 1  | -1 | 1  | -1 | -1 | -1 | -1 | -1 | 1  | 1  | 1  | 1  | -1 | -1 |
| 14    | -1 | 1  | -1 | 1  | -1 | 1  | 1  | 1  | -1 | 1  | 1  | -1 | 1  | 1  | 1  | 1  |
| 15    | -1 | 1  | 1  | -1 | -1 | 1  | -1 | -1 | -1 | 1  | -1 | 1  | -1 | 1  | -1 | -1 |

**Supplementary Table 19:** Weights of neuron 0 in 3-class binary  $28 \times 28$  image classification.

| Index | 0  | 1  | 2  | 3  | 4  | 5  | 6  | 7  | 8  | 9  | 10 | 11 | 12 | 13 | 14 | 15 | 16 | 17 | 18 | 19 | 20 | 21 | 22 | 23 | 24 | 25 | 26 | 27 |
|-------|----|----|----|----|----|----|----|----|----|----|----|----|----|----|----|----|----|----|----|----|----|----|----|----|----|----|----|----|
| 0     | -1 | -1 | -1 | -1 | 1  | -1 | 1  | -1 | 1  | -1 | 1  | -1 | -1 | 1  | -1 | 1  | -1 | 1  | 1  | -1 | -1 | 1  | -1 | -1 | -1 | 1  | 1  | 1  |
| 1     | -1 | -1 | 1  | 1  | 1  | 1  | -1 | 1  | 1  | -1 | 1  | 1  | -1 | 1  | -1 | 1  | 1  | 1  | 1  | 1  | 1  | -1 | -1 | 1  | -1 | 1  | 1  | -1 |
| 2     | -1 | -1 | 1  | -1 | 1  | 1  | 1  | 1  | -1 | -1 | -1 | 1  | 1  | -1 | -1 | 1  | 1  | -1 | -1 | 1  | -1 | -1 | 1  | 1  | -1 | -1 | 1  | -1 |
| 3     | -1 | -1 | -1 | 1  | -1 | 1  | -1 | -1 | 1  | -1 | 1  | -1 | -1 | -1 | -1 | 1  | -1 | 1  | -1 | 1  | -1 | 1  | -1 | 1  | -1 | 1  | -1 | -1 |
| 4     | -1 | 1  | 1  | -1 | -1 | -1 | -1 | 1  | -1 | -1 | -1 | 1  | 1  | -1 | 1  | -1 | -1 | 1  | 1  | -1 | -1 | 1  | -1 | 1  | 1  | 1  | -1 | 1  |
| 5     | 1  | 1  | 1  | -1 | -1 | 1  | -1 | -1 | 1  | -1 | 1  | -1 | -1 | 1  | 1  | -1 | -1 | 1  | -1 | -1 | 1  | -1 | 1  | -1 | 1  | -1 | -1 | -1 |
| 6     | -1 | 1  | 1  | 1  | 1  | 1  | -1 | 1  | -1 | -1 | -1 | -1 | 1  | -1 | -1 | -1 | 1  | 1  | 1  | 1  | -1 | 1  | -1 | -1 | 1  | 1  | 1  | 1  |
| 7     | 1  | -1 | -1 | -1 | 1  | 1  | -1 | -1 | -1 | -1 | -1 | -1 | 1  | 1  | 1  | 1  | 1  | 1  | -1 | 1  | 1  | 1  | 1  | 1  | 1  | 1  | 1  | -1 |
| 8     | -1 | -1 | -1 | -1 | 1  | -1 | -1 | 1  | -1 | 1  | -1 | -1 | 1  | -1 | 1  | 1  | -1 | 1  | 1  | -1 | -1 | -1 | -1 | 1  | -1 | 1  | 1  | -1 |
| 9     | -1 | -1 | 1  | -1 | 1  | 1  | -1 | 1  | -1 | 1  | -1 | 1  | -1 | 1  | -1 | 1  | -1 | 1  | 1  | 1  | 1  | -1 | 1  | 1  | 1  | 1  | 1  | -1 |
| 10    | 1  | -1 | 1  | -1 | 1  | -1 | 1  | 1  | 1  | 1  | 1  | 1  | 1  | 1  | 1  | -1 | 1  | -1 | 1  | 1  | 1  | 1  | -1 | 1  | 1  | -1 | -1 | -1 |
| 11    | -1 | 1  | -1 | 1  | 1  | 1  | -1 | 1  | -1 | 1  | 1  | 1  | 1  | 1  | 1  | -1 | -1 | 1  | 1  | 1  | 1  | -1 | 1  | 1  | 1  | 1  | -1 | -1 |
| 12    | -1 | 1  | 1  | -1 | 1  | 1  | 1  | 1  | 1  | 1  | 1  | 1  | 1  | 1  | -1 | -1 | -1 | 1  | -1 | 1  | 1  | 1  | 1  | 1  | 1  | 1  | -1 | -1 |
| 13    | 1  | 1  | -1 | 1  | 1  | 1  | 1  | 1  | 1  | 1  | 1  | 1  | -1 | -1 | -1 | -1 | -1 | -1 | 1  | 1  | -1 | 1  | 1  | 1  | -1 | 1  | 1  | -1 |
| 14    | 1  | -1 | 1  | 1  | 1  | 1  | 1  | 1  | 1  | 1  | 1  | 1  | -1 | -1 | -1 | -1 | -1 | -1 | -1 | 1  | 1  | 1  | 1  | 1  | 1  | -1 | 1  | -1 |
| 15    | 1  | 1  | 1  | 1  | -1 | 1  | 1  | 1  | 1  | 1  | 1  | -1 | -1 | -1 | -1 | -1 | -1 | -1 | -1 | 1  | -1 | 1  | 1  | 1  | 1  | 1  | 1  | 1  |
| 16    | 1  | 1  | 1  | 1  | -1 | 1  | 1  | 1  | 1  | 1  | 1  | -1 | -1 | -1 | -1 | -1 | -1 | -1 | -1 | -1 | -1 | -1 | -1 | -1 | 1  | 1  | -1 | -1 |
| 17    | -1 | 1  | 1  | -1 | -1 | -1 | 1  | 1  | -1 | 1  | 1  | -1 | -1 | -1 | -1 | -1 | -1 | 1  | -1 | -1 | -1 | -1 | 1  | -1 | -1 | -1 | -1 | -1 |
| 18    | -1 | 1  | 1  | -1 | -1 | -1 | 1  | 1  | 1  | 1  | 1  | -1 | -1 | -1 | -1 | -1 | -1 | -1 | 1  | 1  | -1 | 1  | -1 | 1  | 1  | -1 | 1  | 1  |
| 19    | -1 | 1  | -1 | 1  | -1 | -1 | -1 | 1  | -1 | 1  | 1  | 1  | -1 | -1 | -1 | -1 | -1 | -1 | 1  | 1  | -1 | 1  | -1 | -1 | -1 | -1 | -1 | -1 |
| 20    | -1 | 1  | -1 | -1 | 1  | 1  | 1  | 1  | -1 | 1  | 1  | 1  | -1 | 1  | -1 | 1  | 1  | -1 | -1 | -1 | 1  | -1 | -1 | -1 | -1 | -1 | 1  | 1  |
| 21    | -1 | 1  | -1 | -1 | -1 | -1 | 1  | -1 | 1  | -1 | 1  | 1  | 1  | -1 | -1 | 1  | 1  | -1 | -1 | -1 | -1 | -1 | -1 | -1 | -1 | -1 | 1  | -1 |
| 22    | -1 | 1  | 1  | -1 | -1 | -1 | -1 | -1 | -1 | 1  | 1  | 1  | 1  | 1  | 1  | 1  | -1 | 1  | 1  | -1 | 1  | -1 | 1  | -1 | -1 | -1 | -1 | 1  |
| 23    | 1  | 1  | -1 | 1  | -1 | 1  | -1 | -1 | -1 | -1 | 1  | 1  | 1  | 1  | 1  | 1  | 1  | -1 | -1 | -1 | 1  | -1 | -1 | -1 | -1 | -1 | -1 | -1 |
| 24    | -1 | -1 | -1 | 1  | 1  | 1  | -1 | -1 | -1 | -1 | 1  | -1 | 1  | 1  | 1  | 1  | 1  | -1 | -1 | 1  | -1 | -1 | 1  | 1  | 1  | 1  | -1 | -1 |
| 25    | -1 | -1 | 1  | 1  | 1  | 1  | -1 | 1  | -1 | -1 | 1  | 1  | -1 | -1 | 1  | 1  | -1 | 1  | -1 | -1 | -1 | -1 | -1 | -1 | -1 | 1  | 1  | -1 |
| 26    | -1 | 1  | -1 | 1  | 1  | 1  | -1 | 1  | 1  | -1 | -1 | -1 | -1 | -1 | -1 | 1  | 1  | 1  | -1 | -1 | 1  | 1  | 1  | 1  | 1  | -1 | 1  | -1 |
| 27    | 1  | 1  | -1 | -1 | 1  | 1  | 1  | 1  | 1  | 1  | -1 | -1 | -1 | -1 | 1  | 1  | -1 | 1  | 1  | 1  | -1 | 1  | 1  | 1  | 1  | 1  | -1 | 1  |



**Supplementary Table 20:** Weights of neuron 1 in 3-class binary  $28 \times 28$  image classification.

| Index | 0  | 1  | 2  | 3  | 4  | 5  | 6  | 7  | 8  | 9  | 10 | 11 | 12 | 13 | 14 | 15 | 16 | 17 | 18 | 19 | 20 | 21 | 22 | 23 | 24 | 25 | 26 | 27 |
|-------|----|----|----|----|----|----|----|----|----|----|----|----|----|----|----|----|----|----|----|----|----|----|----|----|----|----|----|----|
| 0     | 1  | -1 | 1  | 1  | 1  | -1 | 1  | 1  | 1  | 1  | 1  | 1  | 1  | 1  | -1 | 1  | -1 | 1  | -1 | 1  | -1 | 1  | -1 | 1  | -1 | 1  | -1 | 1  |
| 1     | 1  | 1  | 1  | 1  | 1  | 1  | 1  | 1  | -1 | -1 | -1 | 1  | 1  | 1  | -1 | 1  | 1  | 1  | -1 | 1  | 1  | -1 | 1  | -1 | -1 | -1 | -1 | -1 |
| 2     | 1  | 1  | -1 | 1  | 1  | -1 | 1  | 1  | 1  | 1  | 1  | -1 | 1  | 1  | 1  | -1 | 1  | -1 | -1 | 1  | 1  | 1  | 1  | 1  | 1  | 1  | 1  | 1  |
| 3     | 1  | 1  | 1  | -1 | 1  | -1 | -1 | 1  | -1 | -1 | 1  | -1 | -1 | -1 | -1 | -1 | -1 | -1 | 1  | 1  | 1  | 1  | -1 | 1  | -1 | -1 | 1  | -1 |
| 4     | 1  | 1  | 1  | 1  | 1  | -1 | 1  | -1 | -1 | -1 | -1 | -1 | -1 | -1 | 1  | 1  | 1  | -1 | -1 | 1  | -1 | -1 | 1  | 1  | 1  | -1 | 1  | -1 |
| 5     | -1 | 1  | 1  | -1 | 1  | -1 | 1  | 1  | -1 | -1 | -1 | -1 | -1 | -1 | -1 | -1 | -1 | -1 | 1  | 1  | 1  | 1  | 1  | 1  | 1  | 1  | 1  | -1 |
| 6     | 1  | 1  | 1  | -1 | 1  | -1 | -1 | -1 | -1 | -1 | -1 | -1 | -1 | -1 | 1  | -1 | -1 | -1 | 1  | 1  | 1  | 1  | 1  | 1  | -1 | -1 | -1 | -1 |
| 7     | -1 | 1  | 1  | 1  | 1  | -1 | -1 | -1 | -1 | -1 | -1 | -1 | 1  | -1 | -1 | -1 | -1 | -1 | -1 | 1  | -1 | 1  | -1 | 1  | 1  | 1  | 1  | -1 |
| 8     | -1 | 1  | 1  | -1 | 1  | 1  | 1  | -1 | -1 | -1 | -1 | -1 | 1  | 1  | -1 | 1  | 1  | 1  | -1 | -1 | 1  | -1 | 1  | -1 | -1 | -1 | -1 | -1 |
| 9     | -1 | -1 | 1  | 1  | -1 | -1 | -1 | -1 | -1 | -1 | 1  | -1 | 1  | 1  | 1  | 1  | 1  | 1  | -1 | -1 | 1  | -1 | 1  | -1 | 1  | 1  | 1  | 1  |
| 10    | -1 | -1 | 1  | -1 | -1 | 1  | -1 | 1  | -1 | -1 | -1 | -1 | -1 | 1  | 1  | 1  | -1 | -1 | 1  | 1  | -1 | -1 | -1 | -1 | -1 | -1 | 1  | 1  |
| 11    | 1  | 1  | 1  | 1  | -1 | 1  | -1 | -1 | -1 | -1 | -1 | -1 | 1  | 1  | 1  | 1  | 1  | -1 | -1 | -1 | -1 | -1 | -1 | 1  | 1  | -1 | 1  | 1  |
| 12    | 1  | -1 | 1  | 1  | 1  | 1  | -1 | -1 | -1 | 1  | 1  | -1 | 1  | 1  | 1  | 1  | 1  | -1 | -1 | -1 | 1  | 1  | -1 | -1 | -1 | -1 | 1  | -1 |
| 13    | -1 | -1 | -1 | -1 | 1  | 1  | -1 | -1 | -1 | -1 | -1 | 1  | 1  | 1  | 1  | 1  | -1 | -1 | -1 | -1 | 1  | -1 | -1 | 1  | -1 | -1 | 1  | 1  |
| 14    | 1  | 1  | 1  | 1  | -1 | -1 | -1 | -1 | -1 | -1 | -1 | -1 | 1  | 1  | 1  | 1  | 1  | -1 | -1 | -1 | -1 | -1 | -1 | -1 | -1 | -1 | -1 | -1 |
| 15    | 1  | 1  | -1 | 1  | 1  | 1  | -1 | -1 | 1  | -1 | -1 | -1 | 1  | 1  | 1  | 1  | -1 | -1 | -1 | -1 | -1 | -1 | -1 | -1 | -1 | -1 | 1  | 1  |
| 16    | 1  | 1  | 1  | 1  | 1  | -1 | -1 | -1 | -1 | -1 | -1 | -1 | -1 | 1  | 1  | 1  | 1  | -1 | -1 | -1 | -1 | -1 | 1  | -1 | -1 | -1 | -1 | -1 |
| 17    | 1  | 1  | -1 | 1  | 1  | -1 | -1 | -1 | -1 | -1 | -1 | -1 | -1 | 1  | 1  | 1  | -1 | -1 | -1 | -1 | -1 | -1 | -1 | -1 | -1 | -1 | -1 | -1 |
| 18    | 1  | 1  | 1  | -1 | -1 | 1  | -1 | -1 | -1 | -1 | -1 | -1 | -1 | 1  | 1  | 1  | -1 | -1 | -1 | -1 | -1 | -1 | -1 | -1 | -1 | -1 | -1 | -1 |
| 19    | -1 | -1 | 1  | 1  | -1 | -1 | -1 | -1 | -1 | -1 | -1 | -1 | -1 | 1  | -1 | -1 | -1 | 1  | -1 | -1 | 1  | -1 | -1 | -1 | -1 | 1  | -1 | -1 |
| 20    | -1 | 1  | -1 | -1 | -1 | 1  | 1  | 1  | -1 | -1 | -1 | -1 | -1 | -1 | 1  | 1  | -1 | -1 | -1 | -1 | -1 | -1 | -1 | -1 | 1  | -1 | -1 | 1  |
| 21    | -1 | 1  | 1  | -1 | 1  | 1  | 1  | -1 | -1 | -1 | -1 | 1  | -1 | -1 | -1 | -1 | -1 | -1 | -1 | -1 | -1 | -1 | 1  | -1 | 1  | 1  | 1  | 1  |
| 22    | 1  | -1 | 1  | -1 | 1  | -1 | -1 | 1  | 1  | 1  | 1  | -1 | -1 | -1 | 1  | -1 | -1 | 1  | 1  | -1 | -1 | -1 | -1 | -1 | 1  | 1  | -1 | 1  |
| 23    | 1  | -1 | 1  | 1  | 1  | 1  | 1  | 1  | 1  | 1  | -1 | -1 | 1  | 1  | 1  | -1 | 1  | -1 | -1 | -1 | -1 | 1  | -1 | -1 | 1  | 1  | -1 | 1  |
| 24    | 1  | -1 | 1  | -1 | 1  | 1  | 1  | -1 | -1 | 1  | 1  | 1  | -1 | 1  | -1 | 1  | -1 | 1  | -1 | 1  | -1 | -1 | 1  | 1  | 1  | 1  | 1  | -1 |
| 25    | 1  | -1 | 1  | 1  | -1 | -1 | 1  | 1  | 1  | 1  | 1  | 1  | 1  | 1  | -1 | 1  | -1 | -1 | -1 | -1 | 1  | 1  | -1 | 1  | 1  | -1 | -1 | -1 |
| 26    | 1  | 1  | 1  | 1  | -1 | 1  | 1  | -1 | -1 | 1  | 1  | 1  | 1  | 1  | -1 | 1  | -1 | 1  | -1 | -1 | -1 | -1 | 1  | 1  | 1  | 1  | -1 | 1  |
| 27    | 1  | 1  | -1 | 1  | -1 | -1 | 1  | -1 | -1 | 1  | 1  | 1  | -1 | 1  | 1  | 1  | -1 | -1 | -1 | -1 | -1 | 1  | -1 | 1  | 1  | 1  | 1  | -1 |

**Supplementary Table 21:** Weights of neuron 2 in 3-class binary  $28 \times 28$  image classification.

| Index | 0  | 1  | 2  | 3  | 4  | 5  | 6  | 7  | 8  | 9  | 10 | 11 | 12 | 13 | 14 | 15 | 16 | 17 | 18 | 19 | 20 | 21 | 22 | 23 | 24 | 25 | 26 | 27 |
|-------|----|----|----|----|----|----|----|----|----|----|----|----|----|----|----|----|----|----|----|----|----|----|----|----|----|----|----|----|
| 0     | -1 | 1  | -1 | -1 | 1  | 1  | -1 | 1  | 1  | 1  | 1  | 1  | 1  | -1 | 1  | 1  | 1  | -1 | -1 | -1 | -1 | 1  | 1  | -1 | 1  | 1  | 1  | 1  |
| 1     | 1  | -1 | -1 | 1  | -1 | -1 | -1 | 1  | -1 | -1 | -1 | -1 | -1 | 1  | 1  | -1 | 1  | 1  | -1 | -1 | -1 | -1 | -1 | -1 | 1  | -1 | 1  | -1 |
| 2     | 1  | 1  | -1 | 1  | -1 | -1 | -1 | -1 | 1  | -1 | -1 | -1 | 1  | -1 | -1 | -1 | -1 | -1 | 1  | -1 | 1  | -1 | -1 | -1 | 1  | 1  | -1 | 1  |
| 3     | -1 | -1 | -1 | 1  | -1 | 1  | 1  | -1 | 1  | 1  | 1  | 1  | 1  | -1 | 1  | 1  | -1 | -1 | 1  | -1 | 1  | -1 | -1 | -1 | 1  | 1  | -1 | -1 |
| 4     | 1  | 1  | -1 | 1  | -1 | -1 | 1  | 1  | -1 | 1  | 1  | -1 | 1  | 1  | 1  | -1 | 1  | -1 | -1 | 1  | -1 | -1 | -1 | -1 | 1  | -1 | 1  | -1 |
| 5     | 1  | -1 | 1  | -1 | 1  | -1 | 1  | 1  | -1 | -1 | 1  | 1  | -1 | 1  | 1  | 1  | 1  | -1 | 1  | 1  | 1  | -1 | 1  | -1 | -1 | -1 | 1  | 1  |
| 6     | 1  | 1  | -1 | -1 | -1 | -1 | 1  | 1  | 1  | 1  | 1  | 1  | 1  | 1  | 1  | 1  | 1  | -1 | 1  | 1  | 1  | -1 | 1  | -1 | -1 | 1  | -1 | 1  |
| 7     | 1  | 1  | -1 | 1  | -1 | -1 | 1  | -1 | 1  | 1  | -1 | 1  | 1  | 1  | 1  | 1  | -1 | 1  | -1 | -1 | -1 | 1  | -1 | 1  | -1 | -1 | -1 | 1  |
| 8     | -1 | -1 | 1  | 1  | -1 | 1  | 1  | 1  | 1  | 1  | 1  | 1  | 1  | -1 | 1  | -1 | 1  | -1 | -1 | -1 | -1 | -1 | -1 | 1  | -1 | -1 | -1 | -1 |
| 9     | 1  | -1 | -1 | 1  | 1  | 1  | 1  | -1 | 1  | -1 | -1 | -1 | -1 | -1 | -1 | -1 | -1 | -1 | -1 | 1  | 1  | -1 | -1 | -1 | 1  | 1  | 1  | 1  |
| 10    | 1  | 1  | -1 | -1 | 1  | -1 | 1  | -1 | 1  | -1 | -1 | -1 | -1 | -1 | -1 | -1 | -1 | -1 | 1  | 1  | -1 | -1 | -1 | -1 | -1 | -1 | -1 | -1 |
| 11    | 1  | 1  | 1  | -1 | 1  | -1 | -1 | -1 | -1 | -1 | -1 | -1 | -1 | -1 | -1 | -1 | -1 | -1 | 1  | -1 | -1 | -1 | -1 | -1 | -1 | -1 | -1 | 1  |
| 12    | -1 | 1  | 1  | 1  | -1 | -1 | -1 | -1 | -1 | -1 | -1 | -1 | -1 | -1 | -1 | -1 | -1 | -1 | 1  | 1  | 1  | -1 | -1 | -1 | 1  | -1 | -1 | -1 |
| 13    | 1  | 1  | -1 | -1 | -1 | -1 | -1 | -1 | -1 | -1 | -1 | -1 | -1 | -1 | 1  | -1 | 1  | 1  | 1  | -1 | -1 | -1 | -1 | 1  | 1  | 1  | 1  | -1 |
| 14    | -1 | 1  | -1 | 1  | -1 | -1 | -1 | -1 | -1 | -1 | -1 | 1  | 1  | 1  | 1  | 1  | 1  | 1  | 1  | 1  | -1 | -1 | -1 | -1 | 1  | 1  | 1  | -1 |
| 15    | 1  | -1 | 1  | 1  | 1  | -1 | -1 | 1  | -1 | 1  | 1  | 1  | 1  | 1  | 1  | 1  | 1  | 1  | 1  | 1  | 1  | -1 | -1 | -1 | 1  | 1  | 1  | 1  |
| 16    | 1  | 1  | 1  | -1 | 1  | -1 | -1 | -1 | 1  | 1  | -1 | 1  | 1  | 1  | 1  | 1  | 1  | 1  | 1  | 1  | 1  | 1  | -1 | 1  | -1 | 1  | -1 | -1 |
| 17    | -1 | -1 | 1  | -1 | -1 | 1  | 1  | 1  | 1  | 1  | 1  | 1  | 1  | 1  | 1  | 1  | 1  | 1  | 1  | -1 | 1  | -1 | 1  | 1  | 1  | 1  | 1  | 1  |
| 18    | -1 | 1  | 1  | 1  | 1  | 1  | 1  | 1  | 1  | 1  | 1  | 1  | 1  | 1  | 1  | 1  | -1 | 1  | 1  | 1  | -1 | 1  | 1  | 1  | 1  | -1 | 1  | -1 |
| 19    | 1  | 1  | -1 | 1  | -1 | 1  | 1  | 1  | 1  | -1 | 1  | 1  | 1  | -1 | -1 | 1  | 1  | 1  | -1 | 1  | 1  | 1  | 1  | 1  | 1  | -1 | 1  | 1  |
| 20    | 1  | 1  | 1  | -1 | 1  | 1  | 1  | 1  | 1  | -1 | 1  | -1 | -1 | -1 | 1  | 1  | -1 | -1 | 1  | 1  | 1  | 1  | 1  | 1  | 1  | 1  | -1 | -1 |
| 21    | -1 | 1  | -1 | 1  | 1  | 1  | 1  | -1 | 1  | 1  | -1 | -1 | -1 | 1  | -1 | 1  | -1 | -1 | 1  | -1 | 1  | 1  | 1  | 1  | -1 | 1  | 1  | -1 |
| 22    | 1  | -1 | -1 | 1  | 1  | -1 | 1  | 1  | -1 | -1 | 1  | -1 | -1 | -1 | -1 | 1  | 1  | -1 | 1  | -1 | 1  | 1  | 1  | 1  | 1  | -1 | -1 | -1 |
| 23    | -1 | -1 | -1 | 1  | 1  | -1 | -1 | -1 | -1 | 1  | 1  | 1  | -1 | -1 | -1 | -1 | -1 | -1 | 1  | 1  | 1  | 1  | 1  | -1 | -1 | -1 | -1 | 1  |
| 24    | 1  | 1  | -1 | 1  | -1 | -1 | 1  | 1  | -1 | 1  | -1 | 1  | -1 | -1 | 1  | 1  | 1  | 1  | 1  | -1 | -1 | -1 | -1 | 1  | 1  | 1  | 1  | 1  |
| 25    | 1  | -1 | 1  | -1 | -1 | -1 | 1  | -1 | -1 | 1  | -1 | 1  | 1  | 1  | 1  | 1  | -1 | 1  | 1  | -1 | -1 | -1 | -1 | -1 | 1  | 1  | 1  | 1  |
| 26    | -1 | 1  | 1  | -1 | -1 | 1  | -1 | 1  | 1  | -1 | 1  | -1 | 1  | 1  | 1  | -1 | -1 | -1 | -1 | -1 | -1 | 1  | -1 | -1 | -1 | 1  | 1  | -1 |
| 27    | 1  | -1 | 1  | -1 | -1 | -1 | -1 | 1  | -1 | 1  | -1 | -1 | -1 | 1  | -1 | 1  | 1  | -1 | -1 | 1  | 1  | -1 | 1  | 1  | -1 | -1 | 1  | 1  |

**Supplementary Table 22:** Weights of neuron 0 in 2-class 3-bit  $8 \times 8$  image classification.

| <b>Index</b> | <b>0</b> | <b>1</b> | <b>2</b> | <b>3</b> | <b>4</b> | <b>5</b> | <b>6</b> | <b>7</b> |
|--------------|----------|----------|----------|----------|----------|----------|----------|----------|
| <b>0</b>     | -1       | -1       | -1       | 1        | -1       | 1        | 1        | -1       |
| <b>1</b>     | -1       | 1        | 1        | 1        | -1       | 1        | -1       | -1       |
| <b>2</b>     | -1       | -1       | 1        | 1        | -1       | 1        | 1        | 1        |
| <b>3</b>     | -1       | -1       | 1        | 1        | -1       | 1        | 1        | -1       |
| <b>4</b>     | 1        | 1        | 1        | -1       | -1       | 1        | 1        | 1        |
| <b>5</b>     | -1       | 1        | 1        | -1       | -1       | 1        | 1        | 1        |
| <b>6</b>     | 1        | -1       | 1        | 1        | 1        | -1       | -1       | 1        |
| <b>7</b>     | -1       | -1       | -1       | 1        | 1        | -1       | -1       | -1       |

**Supplementary Table 23:** Weights of neuron 1 in 2-class 3-bit  $8 \times 8$  image classification.

| <b>Index</b> | <b>0</b> | <b>1</b> | <b>2</b> | <b>3</b> | <b>4</b> | <b>5</b> | <b>6</b> | <b>7</b> |
|--------------|----------|----------|----------|----------|----------|----------|----------|----------|
| <b>0</b>     | 1        | -1       | 1        | 1        | 1        | -1       | -1       | 1        |
| <b>1</b>     | 1        | 1        | -1       | -1       | -1       | 1        | 1        | -1       |
| <b>2</b>     | 1        | 1        | -1       | -1       | -1       | -1       | -1       | 1        |
| <b>3</b>     | 1        | -1       | -1       | -1       | 1        | -1       | -1       | 1        |
| <b>4</b>     | -1       | -1       | -1       | 1        | 1        | -1       | -1       | 1        |
| <b>5</b>     | -1       | -1       | -1       | -1       | -1       | -1       | -1       | 1        |
| <b>6</b>     | 1        | -1       | -1       | -1       | 1        | -1       | -1       | 1        |
| <b>7</b>     | 1        | 1        | 1        | 1        | -1       | 1        | -1       | -1       |

**Supplementary Table 24:** Weights of neuron 0 in 2-class 3-bit  $12 \times 12$  image classification.

| <b>Index</b> | <b>0</b> | <b>1</b> | <b>2</b> | <b>3</b> | <b>4</b> | <b>5</b> | <b>6</b> | <b>7</b> | <b>8</b> | <b>9</b> | <b>10</b> | <b>11</b> |
|--------------|----------|----------|----------|----------|----------|----------|----------|----------|----------|----------|-----------|-----------|
| <b>0</b>     | 1        | -1       | -1       | 1        | -1       | 1        | -1       | 1        | -1       | -1       | -1        | -1        |
| <b>1</b>     | 1        | -1       | 1        | -1       | -1       | 1        | -1       | -1       | 1        | -1       | -1        | 1         |
| <b>2</b>     | -1       | -1       | -1       | 1        | 1        | 1        | 1        | 1        | -1       | 1        | -1        | -1        |
| <b>3</b>     | -1       | -1       | 1        | -1       | 1        | 1        | 1        | 1        | 1        | 1        | -1        | 1         |
| <b>4</b>     | 1        | -1       | 1        | -1       | -1       | 1        | -1       | -1       | 1        | 1        | 1         | -1        |
| <b>5</b>     | 1        | 1        | -1       | 1        | 1        | -1       | -1       | -1       | 1        | 1        | -1        | 1         |
| <b>6</b>     | -1       | -1       | 1        | 1        | 1        | -1       | -1       | 1        | 1        | 1        | 1         | 1         |
| <b>7</b>     | -1       | 1        | 1        | 1        | 1        | -1       | -1       | 1        | 1        | 1        | 1         | 1         |
| <b>8</b>     | 1        | -1       | 1        | 1        | 1        | -1       | -1       | 1        | -1       | -1       | -1        | 1         |
| <b>9</b>     | 1        | 1        | -1       | 1        | 1        | 1        | 1        | -1       | -1       | 1        | -1        | -1        |
| <b>10</b>    | 1        | -1       | 1        | -1       | 1        | -1       | 1        | -1       | -1       | -1       | -1        | -1        |
| <b>11</b>    | 1        | -1       | 1        | 1        | -1       | -1       | -1       | -1       | 1        | -1       | -1        | -1        |

**Supplementary Table 25:** Weights of neuron 1 in 2-class 3-bit  $12 \times 12$  image classification.

| <b>Index</b> | <b>0</b> | <b>1</b> | <b>2</b> | <b>3</b> | <b>4</b> | <b>5</b> | <b>6</b> | <b>7</b> | <b>8</b> | <b>9</b> | <b>10</b> | <b>11</b> |
|--------------|----------|----------|----------|----------|----------|----------|----------|----------|----------|----------|-----------|-----------|
| <b>0</b>     | 1        | -1       | 1        | 1        | 1        | -1       | -1       | 1        | 1        | 1        | 1         | -1        |
| <b>1</b>     | -1       | -1       | -1       | 1        | -1       | 1        | 1        | -1       | 1        | -1       | -1        | 1         |
| <b>2</b>     | 1        | 1        | 1        | 1        | -1       | -1       | 1        | -1       | 1        | 1        | 1         | -1        |
| <b>3</b>     | -1       | 1        | -1       | 1        | -1       | -1       | 1        | -1       | -1       | -1       | 1         | 1         |
| <b>4</b>     | 1        | 1        | 1        | -1       | -1       | -1       | 1        | 1        | -1       | -1       | -1        | 1         |
| <b>5</b>     | -1       | -1       | -1       | -1       | -1       | -1       | 1        | -1       | -1       | -1       | 1         | 1         |
| <b>6</b>     | -1       | -1       | -1       | -1       | -1       | 1        | 1        | -1       | -1       | -1       | -1        | -1        |
| <b>7</b>     | -1       | 1        | -1       | -1       | -1       | 1        | 1        | -1       | -1       | 1        | 1         | 1         |
| <b>8</b>     | -1       | -1       | -1       | -1       | -1       | 1        | -1       | 1        | -1       | -1       | -1        | 1         |
| <b>9</b>     | 1        | 1        | 1        | 1        | -1       | -1       | -1       | -1       | 1        | -1       | -1        | -1        |
| <b>10</b>    | 1        | 1        | 1        | -1       | 1        | -1       | 1        | 1        | -1       | 1        | 1         | 1         |
| <b>11</b>    | 1        | 1        | 1        | -1       | 1        | 1        | 1        | 1        | -1       | -1       | 1         | -1        |

**Supplementary Table 26:** Weights of neuron 0 in 2-class 3-bit  $16 \times 16$  image classification.

| Index | 0  | 1  | 2  | 3  | 4  | 5  | 6  | 7  | 8  | 9  | 10 | 11 | 12 | 13 | 14 | 15 |
|-------|----|----|----|----|----|----|----|----|----|----|----|----|----|----|----|----|
| 0     | -1 | 1  | -1 | 1  | -1 | -1 | 1  | -1 | 1  | -1 | 1  | -1 | -1 | -1 | 1  | 1  |
| 1     | -1 | 1  | -1 | -1 | 1  | -1 | -1 | -1 | -1 | 1  | -1 | 1  | 1  | 1  | -1 | -1 |
| 2     | -1 | 1  | 1  | -1 | 1  | 1  | -1 | -1 | -1 | -1 | 1  | -1 | -1 | 1  | 1  | -1 |
| 3     | -1 | -1 | 1  | 1  | -1 | 1  | 1  | 1  | -1 | 1  | 1  | -1 | 1  | -1 | -1 | 1  |
| 4     | -1 | -1 | 1  | 1  | -1 | -1 | 1  | 1  | 1  | 1  | -1 | 1  | 1  | 1  | 1  | -1 |
| 5     | -1 | 1  | -1 | 1  | 1  | 1  | 1  | -1 | -1 | -1 | 1  | 1  | 1  | 1  | 1  | 1  |
| 6     | -1 | -1 | 1  | 1  | -1 | 1  | 1  | -1 | -1 | -1 | 1  | -1 | 1  | 1  | 1  | 1  |
| 7     | -1 | -1 | -1 | -1 | 1  | 1  | 1  | -1 | -1 | -1 | 1  | 1  | 1  | 1  | 1  | 1  |
| 8     | -1 | -1 | 1  | 1  | 1  | 1  | 1  | -1 | -1 | -1 | 1  | 1  | 1  | 1  | 1  | -1 |
| 9     | -1 | 1  | -1 | -1 | 1  | 1  | -1 | -1 | -1 | 1  | 1  | 1  | 1  | 1  | -1 | 1  |
| 10    | -1 | -1 | 1  | 1  | 1  | 1  | 1  | -1 | -1 | -1 | 1  | 1  | 1  | -1 | 1  | -1 |
| 11    | 1  | 1  | 1  | 1  | -1 | 1  | 1  | -1 | 1  | -1 | -1 | 1  | 1  | 1  | 1  | -1 |
| 12    | -1 | -1 | -1 | -1 | 1  | -1 | 1  | 1  | -1 | -1 | -1 | -1 | -1 | -1 | -1 | -1 |
| 13    | 1  | -1 | -1 | 1  | -1 | 1  | 1  | 1  | -1 | 1  | 1  | -1 | -1 | 1  | 1  | -1 |
| 14    | -1 | 1  | -1 | -1 | -1 | -1 | 1  | -1 | 1  | -1 | 1  | 1  | -1 | -1 | 1  | 1  |
| 15    | 1  | -1 | -1 | -1 | 1  | -1 | 1  | -1 | -1 | -1 | -1 | -1 | 1  | 1  | -1 | -1 |

**Supplementary Table 27:** Weights of neuron 1 in 2-class 3-bit  $16 \times 16$  image classification.

| <b>Index</b> | <b>0</b> | <b>1</b> | <b>2</b> | <b>3</b> | <b>4</b> | <b>5</b> | <b>6</b> | <b>7</b> | <b>8</b> | <b>9</b> | <b>10</b> | <b>11</b> | <b>12</b> | <b>13</b> | <b>14</b> | <b>15</b> |
|--------------|----------|----------|----------|----------|----------|----------|----------|----------|----------|----------|-----------|-----------|-----------|-----------|-----------|-----------|
| <b>0</b>     | -1       | 1        | 1        | -1       | 1        | 1        | -1       | 1        | 1        | 1        | 1         | -1        | 1         | 1         | -1        | 1         |
| <b>1</b>     | 1        | 1        | -1       | 1        | 1        | 1        | 1        | 1        | 1        | 1        | -1        | -1        | -1        | 1         | 1         | 1         |
| <b>2</b>     | 1        | 1        | 1        | -1       | 1        | 1        | -1       | -1       | 1        | 1        | -1        | 1         | -1        | 1         | 1         | -1        |
| <b>3</b>     | 1        | -1       | 1        | 1        | -1       | 1        | 1        | -1       | 1        | -1       | -1        | 1         | 1         | 1         | 1         | -1        |
| <b>4</b>     | 1        | 1        | 1        | -1       | 1        | -1       | -1       | 1        | -1       | -1       | 1         | -1        | -1        | -1        | -1        | 1         |
| <b>5</b>     | -1       | -1       | -1       | 1        | -1       | -1       | -1       | -1       | 1        | 1        | -1        | 1         | -1        | 1         | -1        | 1         |
| <b>6</b>     | 1        | -1       | 1        | -1       | -1       | -1       | -1       | -1       | 1        | 1        | -1        | -1        | -1        | -1        | 1         | -1        |
| <b>7</b>     | -1       | -1       | -1       | -1       | -1       | -1       | -1       | 1        | 1        | 1        | -1        | -1        | -1        | -1        | 1         | -1        |
| <b>8</b>     | 1        | 1        | 1        | -1       | 1        | -1       | -1       | 1        | 1        | 1        | -1        | -1        | -1        | -1        | 1         | 1         |
| <b>9</b>     | -1       | 1        | 1        | -1       | -1       | -1       | -1       | 1        | 1        | -1       | -1        | -1        | -1        | 1         | 1         | -1        |
| <b>10</b>    | -1       | -1       | -1       | -1       | -1       | -1       | -1       | 1        | 1        | -1       | -1        | -1        | -1        | -1        | 1         | -1        |
| <b>11</b>    | -1       | -1       | -1       | -1       | -1       | -1       | -1       | 1        | -1       | 1        | 1         | -1        | -1        | -1        | 1         | 1         |
| <b>12</b>    | -1       | 1        | 1        | 1        | -1       | 1        | -1       | -1       | -1       | 1        | 1         | -1        | 1         | 1         | 1         | -1        |
| <b>13</b>    | 1        | 1        | 1        | -1       | 1        | -1       | -1       | -1       | -1       | -1       | 1         | -1        | 1         | -1        | -1        | 1         |
| <b>14</b>    | 1        | -1       | 1        | -1       | -1       | 1        | 1        | -1       | -1       | -1       | -1        | 1         | 1         | 1         | 1         | 1         |
| <b>15</b>    | -1       | -1       | -1       | 1        | -1       | -1       | 1        | -1       | -1       | -1       | 1         | -1        | 1         | 1         | 1         | -1        |



**Supplementary Table 28:** Weights of neuron 0 in 2-class 3-bit  $28 \times 28$  image classification.

| Index | 0  | 1  | 2  | 3  | 4  | 5  | 6  | 7  | 8  | 9  | 10 | 11 | 12 | 13 | 14 | 15 | 16 | 17 | 18 | 19 | 20 | 21 | 22 | 23 | 24 | 25 | 26 | 27 |
|-------|----|----|----|----|----|----|----|----|----|----|----|----|----|----|----|----|----|----|----|----|----|----|----|----|----|----|----|----|
| 0     | 1  | -1 | 1  | 1  | 1  | -1 | 1  | -1 | 1  | 1  | 1  | -1 | -1 | -1 | -1 | -1 | 1  | 1  | -1 | 1  | -1 | -1 | 1  | 1  | -1 | -1 | 1  |    |
| 1     | -1 | -1 | 1  | 1  | 1  | -1 | -1 | -1 | 1  | 1  | -1 | -1 | -1 | 1  | 1  | -1 | -1 | 1  | 1  | 1  | -1 | 1  | 1  | 1  | 1  | -1 | -1 | -1 |
| 2     | -1 | -1 | -1 | -1 | -1 | -1 | 1  | 1  | -1 | 1  | -1 | 1  | -1 | -1 | -1 | -1 | 1  | 1  | -1 | 1  | 1  | -1 | -1 | -1 | -1 | 1  | 1  | 1  |
| 3     | -1 | -1 | -1 | -1 | 1  | 1  | -1 | 1  | -1 | 1  | -1 | 1  | 1  | -1 | 1  | -1 | 1  | 1  | -1 | -1 | 1  | -1 | 1  | -1 | -1 | -1 | 1  | 1  |
| 4     | 1  | -1 | -1 | 1  | 1  | -1 | -1 | -1 | -1 | -1 | 1  | 1  | 1  | 1  | -1 | -1 | -1 | 1  | 1  | 1  | 1  | -1 | 1  | 1  | 1  | -1 | -1 | -1 |
| 5     | 1  | -1 | -1 | -1 | 1  | -1 | 1  | -1 | -1 | -1 | -1 | -1 | 1  | 1  | -1 | 1  | -1 | -1 | -1 | -1 | -1 | 1  | -1 | -1 | 1  | -1 | -1 | 1  |
| 6     | -1 | 1  | -1 | 1  | 1  | 1  | -1 | -1 | 1  | 1  | 1  | -1 | 1  | -1 | 1  | 1  | 1  | 1  | 1  | 1  | -1 | 1  | -1 | -1 | -1 | -1 | -1 | 1  |
| 7     | -1 | -1 | 1  | 1  | 1  | 1  | -1 | -1 | 1  | -1 | 1  | 1  | 1  | 1  | 1  | 1  | 1  | 1  | 1  | -1 | -1 | -1 | 1  | 1  | -1 | 1  | 1  | 1  |
| 8     | 1  | -1 | -1 | -1 | -1 | 1  | 1  | -1 | -1 | 1  | 1  | 1  | -1 | -1 | 1  | -1 | -1 | 1  | -1 | 1  | 1  | 1  | 1  | 1  | -1 | -1 | -1 | 1  |
| 9     | -1 | -1 | 1  | 1  | -1 | -1 | -1 | 1  | 1  | 1  | -1 | 1  | 1  | 1  | -1 | -1 | 1  | 1  | 1  | 1  | -1 | -1 | 1  | -1 | -1 | -1 | 1  | 1  |
| 10    | 1  | 1  | 1  | -1 | -1 | -1 | -1 | 1  | -1 | -1 | 1  | 1  | 1  | 1  | 1  | -1 | -1 | 1  | -1 | 1  | 1  | -1 | 1  | 1  | -1 | -1 | -1 | 1  |
| 11    | -1 | 1  | -1 | 1  | -1 | -1 | 1  | -1 | 1  | 1  | -1 | 1  | -1 | 1  | -1 | -1 | -1 | -1 | -1 | 1  | 1  | 1  | 1  | -1 | 1  | -1 | -1 | 1  |
| 12    | -1 | -1 | 1  | 1  | -1 | -1 | 1  | 1  | 1  | 1  | 1  | 1  | -1 | -1 | -1 | -1 | -1 | 1  | 1  | 1  | 1  | 1  | 1  | 1  | -1 | 1  | -1 | 1  |
| 13    | -1 | -1 | -1 | 1  | 1  | 1  | 1  | -1 | 1  | 1  | 1  | -1 | 1  | -1 | -1 | -1 | -1 | -1 | 1  | 1  | 1  | 1  | -1 | 1  | -1 | -1 | -1 | -1 |
| 14    | -1 | -1 | 1  | -1 | -1 | 1  | 1  | 1  | 1  | 1  | 1  | 1  | -1 | -1 | -1 | -1 | -1 | -1 | 1  | 1  | 1  | 1  | 1  | 1  | -1 | -1 | -1 | 1  |
| 15    | 1  | -1 | 1  | 1  | -1 | 1  | 1  | -1 | 1  | 1  | 1  | -1 | -1 | -1 | -1 | -1 | -1 | 1  | 1  | 1  | 1  | 1  | -1 | 1  | 1  | -1 | 1  | -1 |
| 16    | -1 | 1  | 1  | -1 | 1  | -1 | 1  | 1  | 1  | -1 | 1  | 1  | 1  | -1 | -1 | -1 | 1  | -1 | 1  | -1 | 1  | 1  | 1  | -1 | 1  | -1 | -1 | -1 |
| 17    | 1  | 1  | 1  | -1 | 1  | 1  | 1  | 1  | 1  | 1  | -1 | 1  | 1  | -1 | -1 | 1  | -1 | 1  | 1  | -1 | 1  | 1  | -1 | 1  | 1  | 1  | 1  | -1 |
| 18    | 1  | -1 | 1  | -1 | -1 | 1  | 1  | 1  | 1  | 1  | 1  | -1 | -1 | 1  | -1 | 1  | 1  | 1  | 1  | -1 | -1 | -1 | 1  | 1  | -1 | 1  | 1  | -1 |
| 19    | -1 | 1  | 1  | 1  | -1 | -1 | 1  | 1  | -1 | 1  | -1 | 1  | 1  | -1 | 1  | -1 | 1  | -1 | 1  | 1  | -1 | 1  | 1  | -1 | -1 | -1 | -1 | -1 |
| 20    | -1 | 1  | 1  | -1 | -1 | -1 | 1  | 1  | 1  | -1 | 1  | 1  | -1 | 1  | -1 | 1  | -1 | 1  | -1 | 1  | -1 | -1 | 1  | 1  | 1  | 1  | -1 | 1  |
| 21    | 1  | 1  | -1 | 1  | -1 | 1  | -1 | 1  | 1  | 1  | -1 | 1  | 1  | -1 | -1 | -1 | -1 | -1 | -1 | -1 | -1 | -1 | -1 | -1 | -1 | -1 | -1 | -1 |
| 22    | 1  | 1  | 1  | 1  | 1  | 1  | 1  | -1 | 1  | 1  | 1  | 1  | 1  | 1  | 1  | -1 | 1  | 1  | -1 | -1 | -1 | 1  | -1 | -1 | -1 | -1 | 1  | -1 |
| 23    | -1 | -1 | -1 | -1 | -1 | -1 | 1  | -1 | -1 | -1 | -1 | 1  | 1  | 1  | 1  | 1  | -1 | -1 | -1 | -1 | -1 | 1  | 1  | -1 | -1 | -1 | -1 | -1 |
| 24    | -1 | -1 | 1  | 1  | 1  | -1 | -1 | 1  | 1  | -1 | 1  | -1 | -1 | 1  | 1  | 1  | -1 | -1 | -1 | -1 | -1 | -1 | 1  | -1 | -1 | 1  | -1 | 1  |
| 25    | -1 | 1  | -1 | -1 | -1 | -1 | 1  | -1 | -1 | -1 | -1 | -1 | 1  | 1  | -1 | 1  | -1 | 1  | 1  | -1 | -1 | -1 | 1  | 1  | 1  | -1 | 1  | 1  |
| 26    | 1  | 1  | -1 | 1  | 1  | 1  | -1 | -1 | 1  | 1  | -1 | 1  | -1 | 1  | 1  | -1 | -1 | 1  | -1 | -1 | -1 | 1  | -1 | 1  | 1  | 1  | 1  | -1 |
| 27    | 1  | -1 | 1  | -1 | 1  | -1 | 1  | -1 | -1 | -1 | 1  | -1 | -1 | -1 | -1 | 1  | -1 | -1 | 1  | 1  | 1  | 1  | 1  | 1  | -1 | -1 | 1  | -1 |

**Supplementary Table 29:** Weights of neuron 1 in 2-class 3-bit  $28 \times 28$  image classification.

| Index | 0  | 1  | 2  | 3  | 4  | 5  | 6  | 7  | 8  | 9  | 10 | 11 | 12 | 13 | 14 | 15 | 16 | 17 | 18 | 19 | 20 | 21 | 22 | 23 | 24 | 25 | 26 | 27 |
|-------|----|----|----|----|----|----|----|----|----|----|----|----|----|----|----|----|----|----|----|----|----|----|----|----|----|----|----|----|
| 0     | -1 | -1 | 1  | 1  | 1  | -1 | -1 | -1 | -1 | -1 | -1 | -1 | -1 | 1  | 1  | 1  | 1  | -1 | -1 | 1  | 1  | -1 | 1  | -1 | 1  | -1 | 1  | 1  |
| 1     | 1  | 1  | 1  | 1  | 1  | -1 | 1  | 1  | 1  | 1  | 1  | -1 | -1 | -1 | -1 | -1 | -1 | -1 | 1  | 1  | 1  | -1 | -1 | -1 | 1  | -1 | 1  | -1 |
| 2     | 1  | -1 | 1  | -1 | 1  | -1 | 1  | -1 | -1 | -1 | -1 | 1  | -1 | 1  | -1 | 1  | 1  | -1 | 1  | 1  | 1  | 1  | 1  | -1 | -1 | 1  | -1 | 1  |
| 3     | -1 | -1 | 1  | -1 | -1 | 1  | 1  | 1  | -1 | 1  | 1  | -1 | -1 | -1 | 1  | -1 | -1 | 1  | -1 | 1  | 1  | 1  | 1  | 1  | -1 | 1  | -1 | 1  |
| 4     | -1 | 1  | 1  | 1  | 1  | 1  | -1 | -1 | 1  | -1 | 1  | 1  | 1  | -1 | 1  | 1  | 1  | 1  | -1 | 1  | 1  | -1 | 1  | -1 | -1 | 1  | 1  | 1  |
| 5     | 1  | 1  | -1 | 1  | -1 | 1  | -1 | 1  | -1 | 1  | 1  | 1  | 1  | -1 | -1 | -1 | -1 | -1 | -1 | -1 | 1  | 1  | -1 | 1  | 1  | 1  | 1  | -1 |
| 6     | 1  | 1  | 1  | 1  | 1  | -1 | 1  | 1  | 1  | -1 | -1 | -1 | 1  | -1 | -1 | 1  | -1 | 1  | 1  | 1  | -1 | 1  | -1 | 1  | 1  | -1 | 1  | -1 |
| 7     | -1 | -1 | 1  | -1 | -1 | -1 | -1 | -1 | 1  | 1  | -1 | -1 | -1 | -1 | -1 | 1  | -1 | -1 | -1 | -1 | 1  | -1 | -1 | -1 | 1  | -1 | -1 | 1  |
| 8     | -1 | 1  | 1  | -1 | -1 | -1 | -1 | 1  | -1 | -1 | 1  | -1 | 1  | 1  | 1  | -1 | -1 | 1  | -1 | -1 | 1  | -1 | -1 | 1  | 1  | 1  | 1  | -1 |
| 9     | -1 | 1  | -1 | -1 | -1 | 1  | 1  | -1 | -1 | 1  | 1  | 1  | -1 | -1 | 1  | -1 | -1 | -1 | -1 | 1  | -1 | -1 | -1 | -1 | -1 | -1 | -1 | 1  |
| 10    | 1  | 1  | 1  | 1  | -1 | 1  | 1  | -1 | -1 | 1  | 1  | 1  | -1 | -1 | -1 | 1  | 1  | -1 | -1 | -1 | -1 | -1 | -1 | 1  | -1 | -1 | -1 | -1 |
| 11    | -1 | 1  | 1  | -1 | 1  | -1 | 1  | -1 | 1  | -1 | -1 | -1 | -1 | -1 | -1 | 1  | 1  | -1 | -1 | -1 | -1 | -1 | -1 | -1 | -1 | -1 | -1 | 1  |
| 12    | 1  | -1 | -1 | 1  | -1 | -1 | 1  | -1 | -1 | -1 | -1 | -1 | 1  | 1  | 1  | 1  | 1  | 1  | -1 | -1 | -1 | 1  | 1  | 1  | 1  | 1  | -1 | -1 |
| 13    | 1  | -1 | 1  | 1  | 1  | -1 | -1 | -1 | -1 | -1 | 1  | -1 | -1 | 1  | 1  | 1  | 1  | 1  | -1 | -1 | 1  | -1 | -1 | -1 | 1  | -1 | 1  | 1  |
| 14    | 1  | 1  | -1 | -1 | -1 | -1 | -1 | -1 | 1  | -1 | 1  | -1 | 1  | 1  | 1  | 1  | -1 | -1 | 1  | -1 | -1 | 1  | -1 | -1 | -1 | 1  | -1 | -1 |
| 15    | 1  | 1  | 1  | 1  | -1 | 1  | -1 | -1 | -1 | -1 | -1 | -1 | 1  | 1  | 1  | 1  | 1  | -1 | 1  | -1 | -1 | -1 | -1 | -1 | -1 | -1 | -1 | 1  |
| 16    | 1  | 1  | -1 | -1 | 1  | -1 | -1 | -1 | 1  | -1 | -1 | -1 | -1 | 1  | 1  | 1  | 1  | -1 | -1 | -1 | 1  | -1 | -1 | 1  | -1 | -1 | -1 | 1  |
| 17    | 1  | 1  | -1 | -1 | -1 | -1 | 1  | -1 | -1 | -1 | -1 | 1  | 1  | 1  | 1  | -1 | -1 | 1  | -1 | -1 | -1 | -1 | -1 | -1 | 1  | 1  | 1  | -1 |
| 18    | 1  | -1 | -1 | 1  | 1  | 1  | -1 | -1 | -1 | -1 | -1 | 1  | -1 | 1  | 1  | -1 | -1 | -1 | -1 | 1  | 1  | -1 | 1  | -1 | 1  | -1 | 1  | -1 |
| 19    | 1  | -1 | -1 | 1  | 1  | -1 | -1 | -1 | -1 | -1 | -1 | 1  | 1  | -1 | -1 | -1 | -1 | -1 | -1 | -1 | 1  | 1  | 1  | -1 | 1  | 1  | 1  | -1 |
| 20    | -1 | 1  | 1  | 1  | -1 | -1 | 1  | -1 | 1  | 1  | -1 | 1  | -1 | 1  | 1  | 1  | 1  | -1 | 1  | -1 | 1  | -1 | -1 | 1  | 1  | -1 | 1  | -1 |
| 21    | -1 | 1  | 1  | 1  | 1  | -1 | 1  | 1  | 1  | 1  | -1 | -1 | 1  | -1 | -1 | -1 | -1 | 1  | 1  | 1  | 1  | 1  | 1  | 1  | 1  | 1  | -1 | 1  |
| 22    | -1 | -1 | -1 | 1  | 1  | 1  | 1  | 1  | -1 | -1 | -1 | -1 | -1 | -1 | 1  | 1  | 1  | -1 | -1 | -1 | 1  | 1  | 1  | 1  | -1 | -1 | -1 | -1 |
| 23    | -1 | -1 | -1 | 1  | 1  | -1 | -1 | 1  | 1  | -1 | 1  | -1 | 1  | -1 | 1  | 1  | 1  | 1  | -1 | -1 | -1 | -1 | -1 | -1 | -1 | -1 | -1 | -1 |
| 24    | -1 | 1  | -1 | -1 | 1  | -1 | 1  | 1  | -1 | 1  | -1 | -1 | -1 | -1 | 1  | 1  | 1  | -1 | -1 | 1  | 1  | 1  | 1  | 1  | 1  | -1 | -1 | 1  |
| 25    | -1 | 1  | -1 | 1  | -1 | 1  | -1 | -1 | -1 | 1  | 1  | -1 | 1  | 1  | 1  | -1 | -1 | 1  | 1  | -1 | 1  | 1  | 1  | 1  | 1  | 1  | 1  | 1  |
| 26    | 1  | -1 | -1 | 1  | 1  | -1 | 1  | 1  | -1 | 1  | 1  | 1  | 1  | 1  | 1  | 1  | -1 | 1  | -1 | -1 | -1 | -1 | 1  | -1 | 1  | 1  | 1  | -1 |
| 27    | -1 | 1  | 1  | 1  | 1  | 1  | -1 | 1  | 1  | 1  | 1  | -1 | 1  | 1  | 1  | 1  | -1 | 1  | -1 | -1 | 1  | 1  | -1 | 1  | -1 | 1  | 1  | -1 |

**Supplementary Table 30:** Weights of neuron 0 in 3-class 3-bit  $8 \times 8$  image classification.

| <b>Index</b> | <b>0</b> | <b>1</b> | <b>2</b> | <b>3</b> | <b>4</b> | <b>5</b> | <b>6</b> | <b>7</b> |
|--------------|----------|----------|----------|----------|----------|----------|----------|----------|
| <b>0</b>     | -1       | 1        | 1        | -1       | -1       | -1       | -1       | -1       |
| <b>1</b>     | -1       | -1       | -1       | -1       | 1        | 1        | 1        | -1       |
| <b>2</b>     | -1       | -1       | 1        | -1       | 1        | 1        | 1        | 1        |
| <b>3</b>     | 1        | 1        | 1        | 1        | -1       | 1        | 1        | 1        |
| <b>4</b>     | -1       | 1        | 1        | -1       | -1       | 1        | 1        | -1       |
| <b>5</b>     | -1       | -1       | 1        | -1       | -1       | 1        | 1        | -1       |
| <b>6</b>     | -1       | -1       | -1       | 1        | 1        | 1        | -1       | -1       |
| <b>7</b>     | 1        | 1        | -1       | -1       | -1       | -1       | -1       | -1       |

**Supplementary Table 31:** Weights of neuron 1 in 3-class 3-bit  $8 \times 8$  image classification.

| <b>Index</b> | <b>0</b> | <b>1</b> | <b>2</b> | <b>3</b> | <b>4</b> | <b>5</b> | <b>6</b> | <b>7</b> |
|--------------|----------|----------|----------|----------|----------|----------|----------|----------|
| <b>0</b>     | 1        | -1       | -1       | -1       | -1       | -1       | -1       | -1       |
| <b>1</b>     | -1       | -1       | -1       | -1       | -1       | 1        | 1        | -1       |
| <b>2</b>     | -1       | -1       | -1       | -1       | 1        | -1       | -1       | -1       |
| <b>3</b>     | -1       | -1       | -1       | -1       | 1        | -1       | -1       | -1       |
| <b>4</b>     | -1       | -1       | -1       | 1        | 1        | -1       | -1       | -1       |
| <b>5</b>     | -1       | -1       | -1       | 1        | -1       | -1       | -1       | -1       |
| <b>6</b>     | -1       | -1       | -1       | -1       | -1       | -1       | -1       | -1       |
| <b>7</b>     | -1       | 1        | 1        | -1       | -1       | -1       | -1       | -1       |

**Supplementary Table 32:** Weights of neuron 2 in 3-class 3-bit  $8 \times 8$  image classification.

| <b>Index</b> | <b>0</b> | <b>1</b> | <b>2</b> | <b>3</b> | <b>4</b> | <b>5</b> | <b>6</b> | <b>7</b> |
|--------------|----------|----------|----------|----------|----------|----------|----------|----------|
| <b>0</b>     | -1       | -1       | 1        | 1        | 1        | 1        | 1        | 1        |
| <b>1</b>     | -1       | 1        | 1        | 1        | 1        | -1       | -1       | 1        |
| <b>2</b>     | 1        | 1        | 1        | -1       | -1       | -1       | 1        | 1        |
| <b>3</b>     | -1       | -1       | -1       | -1       | -1       | 1        | -1       | 1        |
| <b>4</b>     | 1        | -1       | -1       | 1        | 1        | 1        | -1       | 1        |
| <b>5</b>     | 1        | 1        | 1        | 1        | -1       | 1        | 1        | 1        |
| <b>6</b>     | 1        | 1        | 1        | -1       | -1       | 1        | 1        | 1        |
| <b>7</b>     | 1        | -1       | -1       | 1        | 1        | 1        | 1        | 1        |

**Supplementary Table 33:** Weights of neuron 0 in 3-class 3-bit  $12 \times 12$  image classification.

| <b>Index</b> | <b>0</b> | <b>1</b> | <b>2</b> | <b>3</b> | <b>4</b> | <b>5</b> | <b>6</b> | <b>7</b> | <b>8</b> | <b>9</b> | <b>10</b> | <b>11</b> |
|--------------|----------|----------|----------|----------|----------|----------|----------|----------|----------|----------|-----------|-----------|
| <b>0</b>     | 1        | -1       | 1        | 1        | 1        | 1        | -1       | 1        | 1        | -1       | -1        | -1        |
| <b>1</b>     | 1        | 1        | -1       | 1        | -1       | 1        | -1       | 1        | 1        | 1        | 1         | -1        |
| <b>2</b>     | 1        | -1       | -1       | -1       | -1       | -1       | 1        | 1        | 1        | -1       | 1         | 1         |
| <b>3</b>     | 1        | -1       | 1        | 1        | -1       | -1       | 1        | 1        | 1        | 1        | 1         | -1        |
| <b>4</b>     | 1        | -1       | 1        | 1        | 1        | 1        | 1        | 1        | -1       | 1        | 1         | -1        |
| <b>5</b>     | 1        | -1       | 1        | 1        | 1        | 1        | -1       | -1       | 1        | 1        | 1         | -1        |
| <b>6</b>     | 1        | -1       | 1        | 1        | 1        | -1       | -1       | -1       | 1        | 1        | 1         | -1        |
| <b>7</b>     | -1       | -1       | -1       | 1        | 1        | -1       | -1       | 1        | 1        | 1        | -1        | -1        |
| <b>8</b>     | 1        | -1       | -1       | 1        | 1        | -1       | 1        | 1        | -1       | -1       | -1        | -1        |
| <b>9</b>     | -1       | -1       | -1       | -1       | 1        | 1        | 1        | 1        | -1       | -1       | -1        | -1        |
| <b>10</b>    | -1       | 1        | -1       | -1       | -1       | 1        | 1        | 1        | -1       | -1       | -1        | -1        |
| <b>11</b>    | -1       | 1        | -1       | -1       | 1        | -1       | -1       | 1        | 1        | 1        | -1        | -1        |

**Supplementary Table 34:** Weights of neuron 1 in 3-class 3-bit  $12 \times 12$  image classification.

| <b>Index</b> | <b>0</b> | <b>1</b> | <b>2</b> | <b>3</b> | <b>4</b> | <b>5</b> | <b>6</b> | <b>7</b> | <b>8</b> | <b>9</b> | <b>10</b> | <b>11</b> |
|--------------|----------|----------|----------|----------|----------|----------|----------|----------|----------|----------|-----------|-----------|
| <b>0</b>     | 1        | -1       | 1        | -1       | -1       | -1       | 1        | -1       | 1        | 1        | -1        | 1         |
| <b>1</b>     | 1        | 1        | 1        | -1       | -1       | -1       | 1        | -1       | -1       | -1       | -1        | 1         |
| <b>2</b>     | 1        | 1        | -1       | -1       | -1       | -1       | -1       | -1       | 1        | 1        | 1         | -1        |
| <b>3</b>     | -1       | -1       | -1       | -1       | -1       | -1       | 1        | 1        | -1       | -1       | -1        | -1        |
| <b>4</b>     | 1        | -1       | -1       | -1       | -1       | -1       | 1        | 1        | -1       | -1       | -1        | -1        |
| <b>5</b>     | -1       | -1       | 1        | 1        | -1       | 1        | 1        | -1       | -1       | -1       | -1        | -1        |
| <b>6</b>     | -1       | -1       | -1       | -1       | -1       | 1        | 1        | -1       | -1       | -1       | -1        | -1        |
| <b>7</b>     | 1        | -1       | -1       | -1       | -1       | 1        | 1        | -1       | -1       | -1       | -1        | -1        |
| <b>8</b>     | -1       | -1       | -1       | -1       | -1       | 1        | -1       | -1       | -1       | -1       | -1        | -1        |
| <b>9</b>     | 1        | -1       | -1       | 1        | 1        | -1       | -1       | 1        | -1       | -1       | 1         | -1        |
| <b>10</b>    | -1       | 1        | 1        | 1        | -1       | -1       | -1       | -1       | -1       | -1       | -1        | -1        |
| <b>11</b>    | -1       | 1        | -1       | -1       | 1        | 1        | 1        | 1        | -1       | 1        | -1        | -1        |

**Supplementary Table 35:** Weights of neuron 2 in 3-class 3-bit  $12 \times 12$  image classification.

| <b>Index</b> | <b>0</b> | <b>1</b> | <b>2</b> | <b>3</b> | <b>4</b> | <b>5</b> | <b>6</b> | <b>7</b> | <b>8</b> | <b>9</b> | <b>10</b> | <b>11</b> |
|--------------|----------|----------|----------|----------|----------|----------|----------|----------|----------|----------|-----------|-----------|
| <b>0</b>     | 1        | -1       | -1       | 1        | -1       | 1        | -1       | 1        | -1       | -1       | 1         | -1        |
| <b>1</b>     | 1        | -1       | 1        | 1        | 1        | 1        | 1        | 1        | -1       | 1        | 1         | -1        |
| <b>2</b>     | -1       | 1        | -1       | 1        | 1        | 1        | 1        | 1        | -1       | -1       | -1        | 1         |
| <b>3</b>     | 1        | 1        | 1        | 1        | 1        | 1        | -1       | -1       | -1       | -1       | -1        | -1        |
| <b>4</b>     | -1       | 1        | 1        | -1       | -1       | -1       | -1       | 1        | -1       | -1       | -1        | 1         |
| <b>5</b>     | -1       | -1       | -1       | -1       | -1       | -1       | -1       | 1        | -1       | -1       | -1        | 1         |
| <b>6</b>     | -1       | 1        | -1       | -1       | 1        | 1        | 1        | 1        | 1        | -1       | 1         | 1         |
| <b>7</b>     | -1       | 1        | 1        | 1        | 1        | 1        | 1        | 1        | 1        | 1        | 1         | 1         |
| <b>8</b>     | -1       | 1        | 1        | 1        | -1       | 1        | -1       | 1        | 1        | 1        | 1         | 1         |
| <b>9</b>     | -1       | 1        | 1        | 1        | -1       | -1       | -1       | 1        | 1        | 1        | 1         | 1         |
| <b>10</b>    | -1       | -1       | -1       | -1       | 1        | -1       | -1       | 1        | 1        | 1        | 1         | 1         |
| <b>11</b>    | 1        | -1       | 1        | 1        | -1       | 1        | 1        | -1       | -1       | -1       | -1        | -1        |



**Supplementary Table 36:** Weights of neuron 0 in 3-class 3-bit  $16 \times 16$  image classification.

| Index | 0  | 1  | 2  | 3  | 4  | 5  | 6  | 7  | 8  | 9  | 10 | 11 | 12 | 13 | 14 | 15 |
|-------|----|----|----|----|----|----|----|----|----|----|----|----|----|----|----|----|
| 0     | 1  | -1 | 1  | -1 | -1 | 1  | 1  | 1  | 1  | 1  | 1  | 1  | -1 | -1 | -1 | 1  |
| 1     | 1  | 1  | 1  | 1  | 1  | -1 | 1  | -1 | -1 | 1  | -1 | -1 | 1  | -1 | -1 | 1  |
| 2     | -1 | -1 | 1  | -1 | -1 | 1  | -1 | 1  | 1  | -1 | 1  | 1  | 1  | 1  | 1  | 1  |
| 3     | -1 | -1 | -1 | 1  | -1 | 1  | -1 | -1 | 1  | -1 | -1 | -1 | -1 | 1  | 1  | 1  |
| 4     | 1  | -1 | -1 | -1 | -1 | -1 | -1 | 1  | -1 | 1  | 1  | -1 | -1 | 1  | 1  | 1  |
| 5     | -1 | -1 | -1 | -1 | 1  | -1 | -1 | 1  | 1  | -1 | 1  | -1 | 1  | 1  | -1 | -1 |
| 6     | 1  | -1 | -1 | 1  | 1  | 1  | 1  | 1  | 1  | -1 | 1  | -1 | 1  | 1  | 1  | -1 |
| 7     | 1  | -1 | 1  | 1  | 1  | 1  | 1  | -1 | -1 | -1 | 1  | 1  | 1  | 1  | 1  | -1 |
| 8     | 1  | -1 | 1  | 1  | 1  | 1  | 1  | -1 | -1 | -1 | -1 | 1  | 1  | 1  | -1 | -1 |
| 9     | 1  | -1 | 1  | 1  | 1  | 1  | -1 | -1 | -1 | -1 | 1  | -1 | 1  | 1  | -1 | -1 |
| 10    | 1  | -1 | -1 | -1 | 1  | 1  | -1 | -1 | -1 | -1 | 1  | -1 | 1  | 1  | -1 | -1 |
| 11    | 1  | -1 | -1 | -1 | 1  | 1  | 1  | -1 | -1 | -1 | 1  | -1 | -1 | -1 | -1 | -1 |
| 12    | -1 | -1 | -1 | 1  | -1 | -1 | 1  | 1  | 1  | -1 | -1 | -1 | 1  | -1 | -1 | -1 |
| 13    | -1 | -1 | -1 | -1 | -1 | -1 | 1  | 1  | 1  | 1  | -1 | -1 | -1 | -1 | -1 | -1 |
| 14    | -1 | 1  | -1 | -1 | 1  | -1 | 1  | -1 | 1  | -1 | -1 | -1 | -1 | -1 | -1 | -1 |
| 15    | 1  | 1  | -1 | 1  | 1  | -1 | -1 | 1  | -1 | -1 | 1  | 1  | -1 | 1  | 1  | 1  |

**Supplementary Table 37:** Weights of neuron 1 in 3-class 3-bit  $16 \times 16$  image classification.

| Index | 0  | 1  | 2  | 3  | 4  | 5  | 6  | 7  | 8  | 9  | 10 | 11 | 12 | 13 | 14 | 15 |
|-------|----|----|----|----|----|----|----|----|----|----|----|----|----|----|----|----|
| 0     | 1  | -1 | 1  | 1  | -1 | -1 | -1 | -1 | -1 | -1 | -1 | -1 | 1  | 1  | 1  | -1 |
| 1     | 1  | 1  | 1  | -1 | 1  | 1  | -1 | -1 | 1  | 1  | -1 | -1 | -1 | -1 | -1 | 1  |
| 2     | -1 | 1  | 1  | 1  | -1 | -1 | -1 | -1 | -1 | -1 | -1 | 1  | 1  | 1  | 1  | 1  |
| 3     | -1 | -1 | 1  | -1 | -1 | -1 | -1 | -1 | -1 | -1 | -1 | 1  | 1  | 1  | 1  | -1 |
| 4     | -1 | -1 | 1  | -1 | -1 | -1 | 1  | 1  | -1 | 1  | -1 | -1 | 1  | -1 | -1 | -1 |
| 5     | 1  | -1 | -1 | -1 | -1 | -1 | -1 | 1  | 1  | 1  | -1 | 1  | -1 | -1 | 1  | -1 |
| 6     | -1 | -1 | -1 | -1 | 1  | 1  | -1 | 1  | 1  | 1  | -1 | -1 | -1 | 1  | -1 | -1 |
| 7     | -1 | 1  | -1 | 1  | 1  | -1 | -1 | 1  | 1  | 1  | -1 | 1  | 1  | -1 | -1 | -1 |
| 8     | -1 | -1 | -1 | 1  | -1 | -1 | -1 | 1  | 1  | -1 | -1 | -1 | -1 | 1  | -1 | -1 |
| 9     | 1  | -1 | -1 | -1 | 1  | -1 | -1 | 1  | 1  | -1 | -1 | -1 | 1  | -1 | -1 | -1 |
| 10    | 1  | -1 | -1 | -1 | -1 | -1 | -1 | -1 | 1  | -1 | -1 | -1 | -1 | -1 | -1 | -1 |
| 11    | -1 | -1 | -1 | -1 | -1 | -1 | -1 | 1  | 1  | -1 | 1  | -1 | -1 | -1 | -1 | -1 |
| 12    | 1  | 1  | -1 | -1 | 1  | 1  | -1 | -1 | -1 | -1 | -1 | -1 | -1 | 1  | 1  | -1 |
| 13    | 1  | -1 | -1 | 1  | -1 | -1 | -1 | 1  | 1  | 1  | -1 | -1 | -1 | -1 | 1  | 1  |
| 14    | 1  | 1  | 1  | 1  | 1  | 1  | -1 | -1 | -1 | -1 | -1 | -1 | -1 | -1 | -1 | -1 |
| 15    | 1  | -1 | 1  | -1 | 1  | 1  | 1  | 1  | 1  | 1  | 1  | -1 | 1  | -1 | -1 | -1 |

**Supplementary Table 38:** Weights of neuron 2 in 3-class 3-bit  $16 \times 16$  image classification.

| Index | 0  | 1  | 2  | 3  | 4  | 5  | 6  | 7  | 8  | 9  | 10 | 11 | 12 | 13 | 14 | 15 |
|-------|----|----|----|----|----|----|----|----|----|----|----|----|----|----|----|----|
| 0     | 1  | -1 | -1 | -1 | -1 | 1  | 1  | -1 | 1  | -1 | 1  | 1  | 1  | -1 | 1  | 1  |
| 1     | 1  | -1 | -1 | 1  | 1  | 1  | 1  | 1  | 1  | 1  | 1  | 1  | 1  | 1  | 1  | -1 |
| 2     | -1 | -1 | -1 | 1  | 1  | 1  | 1  | 1  | 1  | 1  | 1  | -1 | -1 | -1 | -1 | -1 |
| 3     | -1 | -1 | 1  | -1 | 1  | 1  | 1  | -1 | 1  | 1  | -1 | -1 | -1 | -1 | -1 | -1 |
| 4     | 1  | 1  | 1  | 1  | 1  | 1  | 1  | 1  | -1 | -1 | -1 | -1 | 1  | -1 | -1 | -1 |
| 5     | -1 | 1  | 1  | 1  | -1 | 1  | 1  | -1 | -1 | -1 | 1  | -1 | 1  | 1  | -1 | 1  |
| 6     | -1 | 1  | 1  | -1 | -1 | -1 | -1 | -1 | -1 | 1  | 1  | -1 | -1 | -1 | 1  | 1  |
| 7     | -1 | 1  | -1 | -1 | -1 | -1 | -1 | -1 | -1 | 1  | 1  | 1  | -1 | -1 | 1  | 1  |
| 8     | 1  | 1  | -1 | -1 | -1 | -1 | 1  | 1  | 1  | 1  | 1  | 1  | -1 | -1 | 1  | 1  |
| 9     | -1 | 1  | 1  | 1  | 1  | 1  | 1  | 1  | 1  | 1  | 1  | 1  | 1  | 1  | 1  | 1  |
| 10    | -1 | 1  | 1  | 1  | 1  | 1  | 1  | 1  | 1  | 1  | 1  | 1  | 1  | 1  | 1  | 1  |
| 11    | -1 | 1  | 1  | 1  | 1  | 1  | 1  | -1 | 1  | -1 | 1  | 1  | 1  | 1  | 1  | 1  |
| 12    | -1 | 1  | 1  | -1 | 1  | 1  | -1 | -1 | -1 | 1  | 1  | 1  | 1  | 1  | 1  | 1  |
| 13    | -1 | 1  | 1  | 1  | 1  | -1 | 1  | -1 | -1 | -1 | 1  | 1  | 1  | 1  | 1  | 1  |
| 14    | 1  | -1 | -1 | 1  | 1  | 1  | -1 | 1  | 1  | 1  | 1  | 1  | 1  | 1  | 1  | 1  |
| 15    | -1 | 1  | -1 | -1 | -1 | -1 | -1 | 1  | 1  | -1 | 1  | 1  | -1 | -1 | -1 | 1  |

**Supplementary Table 39:** Weights of neuron 0 in 3-class 3-bit  $28 \times 28$  image classification.

| Index | 0  | 1  | 2  | 3  | 4  | 5  | 6  | 7  | 8  | 9  | 10 | 11 | 12 | 13 | 14 | 15 | 16 | 17 | 18 | 19 | 20 | 21 | 22 | 23 | 24 | 25 | 26 | 27 |    |
|-------|----|----|----|----|----|----|----|----|----|----|----|----|----|----|----|----|----|----|----|----|----|----|----|----|----|----|----|----|----|
| 0     | 1  | -1 | 1  | -1 | 1  | -1 | 1  | 1  | -1 | 1  | 1  | -1 | 1  | -1 | 1  | 1  | -1 | 1  | -1 | -1 | 1  | -1 | -1 | 1  | -1 | 1  | 1  | 1  |    |
| 1     | -1 | -1 | -1 | 1  | 1  | -1 | 1  | -1 | 1  | -1 | 1  | 1  | 1  | 1  | -1 | -1 | 1  | 1  | -1 | 1  | 1  | -1 | 1  | 1  | 1  | 1  | -1 | 1  | -1 |
| 2     | -1 | 1  | 1  | 1  | 1  | 1  | 1  | 1  | -1 | -1 | -1 | 1  | -1 | -1 | -1 | -1 | -1 | -1 | -1 | -1 | -1 | -1 | 1  | 1  | -1 | -1 | -1 | -1 |    |
| 3     | 1  | -1 | 1  | 1  | 1  | -1 | -1 | 1  | 1  | -1 | -1 | 1  | 1  | -1 | -1 | -1 | -1 | 1  | -1 | 1  | -1 | 1  | -1 | 1  | 1  | 1  | 1  | 1  |    |
| 4     | 1  | -1 | 1  | -1 | 1  | -1 | 1  | -1 | 1  | -1 | 1  | 1  | -1 | -1 | 1  | 1  | 1  | -1 | -1 | 1  | -1 | 1  | 1  | 1  | 1  | 1  | -1 | 1  | -1 |
| 5     | 1  | -1 | -1 | -1 | -1 | -1 | 1  | -1 | -1 | 1  | -1 | -1 | 1  | 1  | -1 | 1  | -1 | 1  | 1  | 1  | -1 | -1 | 1  | -1 | 1  | -1 | -1 | 1  |    |
| 6     | 1  | 1  | -1 | -1 | -1 | -1 | -1 | 1  | 1  | -1 | 1  | 1  | -1 | 1  | -1 | -1 | 1  | 1  | -1 | -1 | 1  | 1  | -1 | 1  | 1  | 1  | 1  | 1  |    |
| 7     | 1  | 1  | -1 | -1 | -1 | 1  | 1  | 1  | -1 | 1  | 1  | 1  | -1 | 1  | 1  | 1  | -1 | 1  | 1  | 1  | -1 | 1  | -1 | 1  | 1  | -1 | -1 | 1  |    |
| 8     | 1  | -1 | -1 | -1 | -1 | -1 | 1  | -1 | -1 | 1  | -1 | -1 | -1 | 1  | -1 | 1  | 1  | 1  | 1  | 1  | -1 | 1  | -1 | 1  | 1  | 1  | 1  | -1 | 1  |
| 9     | -1 | 1  | 1  | -1 | -1 | -1 | 1  | 1  | 1  | 1  | -1 | 1  | 1  | 1  | 1  | -1 | 1  | -1 | -1 | -1 | -1 | -1 | -1 | -1 | 1  | 1  | -1 | 1  |    |
| 10    | -1 | 1  | 1  | -1 | -1 | -1 | 1  | -1 | 1  | -1 | 1  | 1  | 1  | 1  | 1  | 1  | 1  | 1  | 1  | 1  | 1  | 1  | 1  | 1  | 1  | 1  | 1  | -1 | -1 |
| 11    | -1 | 1  | 1  | -1 | -1 | 1  | 1  | 1  | 1  | 1  | 1  | 1  | 1  | 1  | -1 | -1 | -1 | 1  | 1  | -1 | -1 | 1  | 1  | 1  | 1  | -1 | -1 | -1 | -1 |
| 12    | -1 | 1  | 1  | -1 | 1  | 1  | 1  | 1  | 1  | 1  | 1  | 1  | 1  | 1  | -1 | -1 | -1 | 1  | -1 | 1  | 1  | -1 | 1  | 1  | 1  | 1  | -1 | -1 | -1 |
| 13    | 1  | 1  | 1  | -1 | 1  | 1  | 1  | 1  | 1  | 1  | 1  | 1  | -1 | -1 | -1 | -1 | -1 | 1  | 1  | 1  | 1  | 1  | 1  | 1  | 1  | 1  | -1 | -1 | -1 |
| 14    | -1 | 1  | 1  | -1 | 1  | 1  | 1  | 1  | 1  | -1 | 1  | 1  | -1 | -1 | -1 | -1 | -1 | -1 | 1  | -1 | 1  | 1  | -1 | 1  | -1 | -1 | -1 | -1 | -1 |
| 15    | -1 | -1 | 1  | -1 | -1 | 1  | -1 | 1  | 1  | 1  | 1  | -1 | -1 | -1 | -1 | -1 | -1 | -1 | -1 | 1  | -1 | 1  | 1  | 1  | -1 | -1 | -1 | -1 | -1 |
| 16    | 1  | -1 | -1 | -1 | 1  | 1  | 1  | 1  | 1  | 1  | 1  | -1 | -1 | -1 | -1 | -1 | -1 | -1 | -1 | 1  | -1 | -1 | 1  | 1  | 1  | 1  | -1 | -1 | -1 |
| 17    | 1  | 1  | -1 | -1 | -1 | -1 | 1  | 1  | -1 | 1  | 1  | -1 | -1 | -1 | -1 | -1 | -1 | 1  | 1  | -1 | 1  | -1 | -1 | 1  | -1 | -1 | -1 | -1 | -1 |
| 18    | 1  | 1  | -1 | -1 | 1  | -1 | -1 | -1 | 1  | 1  | 1  | -1 | -1 | -1 | -1 | -1 | -1 | -1 | 1  | -1 | 1  | -1 | 1  | -1 | -1 | -1 | -1 | -1 | -1 |
| 19    | 1  | 1  | 1  | -1 | -1 | 1  | -1 | -1 | -1 | 1  | 1  | -1 | 1  | -1 | -1 | 1  | 1  | 1  | -1 | -1 | -1 | 1  | -1 | 1  | -1 | -1 | -1 | -1 | -1 |
| 20    | 1  | 1  | -1 | -1 | -1 | -1 | 1  | -1 | 1  | -1 | -1 | 1  | -1 | -1 | -1 | -1 | -1 | 1  | 1  | -1 | -1 | -1 | -1 | -1 | -1 | 1  | -1 | -1 | 1  |
| 21    | 1  | 1  | -1 | -1 | 1  | 1  | -1 | 1  | -1 | 1  | -1 | 1  | 1  | 1  | -1 | 1  | -1 | -1 | -1 | -1 | 1  | 1  | 1  | -1 | -1 | -1 | -1 | -1 | -1 |
| 22    | 1  | 1  | -1 | 1  | -1 | 1  | -1 | -1 | -1 | 1  | -1 | 1  | 1  | 1  | 1  | 1  | -1 | -1 | -1 | -1 | -1 | -1 | 1  | -1 | -1 | -1 | -1 | -1 | -1 |
| 23    | 1  | -1 | -1 | -1 | -1 | -1 | -1 | 1  | -1 | -1 | 1  | -1 | 1  | 1  | 1  | 1  | 1  | 1  | -1 | -1 | -1 | -1 | -1 | -1 | -1 | -1 | -1 | -1 | 1  |
| 24    | 1  | 1  | -1 | 1  | -1 | -1 | -1 | -1 | -1 | -1 | -1 | 1  | -1 | 1  | 1  | 1  | -1 | -1 | -1 | -1 | -1 | -1 | -1 | -1 | -1 | -1 | -1 | -1 | 1  |
| 25    | -1 | 1  | 1  | -1 | -1 | -1 | 1  | -1 | -1 | -1 | 1  | 1  | -1 | -1 | -1 | -1 | -1 | -1 | -1 | -1 | -1 | 1  | 1  | 1  | -1 | 1  | -1 | -1 | -1 |
| 26    | 1  | -1 | -1 | 1  | -1 | 1  | 1  | -1 | -1 | -1 | -1 | -1 | -1 | -1 | -1 | -1 | -1 | 1  | -1 | -1 | -1 | -1 | -1 | -1 | -1 | -1 | 1  | -1 | 1  |
| 27    | -1 | -1 | -1 | -1 | -1 | 1  | 1  | 1  | 1  | 1  | 1  | 1  | -1 | 1  | -1 | 1  | 1  | 1  | 1  | -1 | -1 | 1  | -1 | -1 | -1 | -1 | 1  | -1 | 1  |

**Supplementary Table 40:** Weights of neuron 1 in 3-class 3-bit  $28 \times 28$  image classification.

| Index | 0  | 1  | 2  | 3  | 4  | 5  | 6  | 7  | 8  | 9  | 10 | 11 | 12 | 13 | 14 | 15 | 16 | 17 | 18 | 19 | 20 | 21 | 22 | 23 | 24 | 25 | 26 | 27 |
|-------|----|----|----|----|----|----|----|----|----|----|----|----|----|----|----|----|----|----|----|----|----|----|----|----|----|----|----|----|
| 0     | -1 | 1  | -1 | 1  | -1 | 1  | 1  | 1  | 1  | -1 | 1  | -1 | 1  | 1  | 1  | 1  | 1  | -1 | 1  | -1 | 1  | -1 | 1  | -1 | -1 | 1  | 1  |    |
| 1     | -1 | 1  | 1  | 1  | -1 | 1  | 1  | -1 | -1 | -1 | 1  | -1 | -1 | -1 | 1  | -1 | -1 | -1 | -1 | 1  | -1 | 1  | -1 | 1  | 1  | 1  | -1 | -1 |
| 2     | 1  | 1  | -1 | 1  | -1 | -1 | -1 | -1 | -1 | -1 | -1 | -1 | -1 | -1 | 1  | -1 | -1 | -1 | -1 | 1  | 1  | -1 | 1  | -1 | -1 | -1 | -1 | -1 |
| 3     | -1 | 1  | 1  | 1  | 1  | -1 | 1  | -1 | 1  | 1  | -1 | -1 | -1 | -1 | 1  | -1 | 1  | -1 | 1  | -1 | -1 | -1 | -1 | -1 | -1 | -1 | 1  | -1 |
| 4     | -1 | 1  | 1  | 1  | 1  | 1  | 1  | -1 | 1  | 1  | -1 | -1 | -1 | -1 | 1  | 1  | -1 | -1 | -1 | 1  | 1  | 1  | 1  | 1  | 1  | -1 | 1  | 1  |
| 5     | -1 | 1  | 1  | 1  | 1  | 1  | 1  | -1 | -1 | -1 | -1 | 1  | -1 | 1  | -1 | -1 | -1 | 1  | 1  | -1 | 1  | 1  | 1  | 1  | 1  | -1 | 1  | -1 |
| 6     | 1  | 1  | -1 | 1  | 1  | -1 | -1 | -1 | -1 | 1  | 1  | -1 | 1  | 1  | -1 | -1 | 1  | 1  | -1 | 1  | 1  | 1  | 1  | 1  | 1  | -1 | -1 | -1 |
| 7     | 1  | 1  | -1 | -1 | 1  | -1 | -1 | 1  | -1 | 1  | -1 | -1 | 1  | 1  | -1 | 1  | -1 | 1  | 1  | 1  | 1  | 1  | -1 | -1 | -1 | -1 | 1  | -1 |
| 8     | -1 | -1 | -1 | 1  | 1  | -1 | -1 | -1 | -1 | -1 | -1 | 1  | 1  | -1 | -1 | 1  | 1  | 1  | 1  | 1  | 1  | 1  | -1 | -1 | -1 | -1 | -1 | 1  |
| 9     | 1  | 1  | -1 | -1 | 1  | -1 | -1 | 1  | 1  | 1  | -1 | 1  | -1 | 1  | 1  | -1 | 1  | 1  | 1  | -1 | 1  | 1  | -1 | -1 | -1 | -1 | -1 | 1  |
| 10    | -1 | 1  | -1 | -1 | -1 | -1 | -1 | 1  | -1 | -1 | -1 | -1 | 1  | 1  | 1  | 1  | 1  | -1 | 1  | 1  | -1 | -1 | -1 | -1 | -1 | 1  | -1 | -1 |
| 11    | -1 | -1 | 1  | -1 | -1 | -1 | -1 | -1 | -1 | 1  | 1  | 1  | 1  | 1  | 1  | 1  | 1  | -1 | -1 | 1  | -1 | 1  | 1  | 1  | -1 | -1 | -1 | 1  |
| 12    | -1 | -1 | 1  | 1  | -1 | 1  | -1 | 1  | -1 | -1 | -1 | -1 | 1  | 1  | 1  | 1  | -1 | -1 | -1 | 1  | 1  | -1 | 1  | 1  | -1 | -1 | -1 | -1 |
| 13    | -1 | 1  | -1 | -1 | -1 | 1  | 1  | 1  | 1  | 1  | -1 | -1 | 1  | 1  | 1  | 1  | 1  | -1 | -1 | -1 | 1  | 1  | 1  | -1 | -1 | -1 | -1 | -1 |
| 14    | -1 | 1  | 1  | -1 | -1 | 1  | -1 | 1  | 1  | -1 | -1 | -1 | 1  | 1  | 1  | 1  | 1  | -1 | -1 | -1 | 1  | -1 | 1  | 1  | -1 | -1 | -1 | -1 |
| 15    | -1 | 1  | -1 | -1 | -1 | -1 | 1  | -1 | -1 | -1 | -1 | -1 | 1  | 1  | 1  | 1  | -1 | -1 | -1 | -1 | 1  | -1 | -1 | 1  | -1 | -1 | -1 | -1 |
| 16    | 1  | 1  | 1  | -1 | -1 | -1 | -1 | 1  | -1 | -1 | -1 | -1 | 1  | 1  | 1  | 1  | -1 | -1 | -1 | -1 | -1 | 1  | -1 | 1  | -1 | -1 | -1 | -1 |
| 17    | -1 | -1 | -1 | -1 | -1 | -1 | 1  | -1 | 1  | -1 | -1 | -1 | -1 | 1  | 1  | 1  | -1 | -1 | -1 | -1 | -1 | -1 | -1 | -1 | -1 | -1 | -1 | -1 |
| 18    | 1  | 1  | -1 | -1 | -1 | -1 | -1 | -1 | -1 | -1 | -1 | -1 | -1 | 1  | 1  | 1  | -1 | -1 | -1 | -1 | -1 | 1  | 1  | -1 | -1 | -1 | -1 | -1 |
| 19    | 1  | -1 | -1 | 1  | -1 | -1 | -1 | -1 | 1  | 1  | -1 | -1 | -1 | 1  | -1 | -1 | 1  | 1  | -1 | 1  | 1  | -1 | -1 | 1  | -1 | -1 | -1 | 1  |
| 20    | -1 | -1 | -1 | -1 | -1 | -1 | 1  | -1 | -1 | -1 | 1  | 1  | 1  | -1 | -1 | -1 | -1 | -1 | 1  | -1 | -1 | 1  | -1 | -1 | -1 | -1 | -1 | 1  |
| 21    | -1 | 1  | 1  | -1 | -1 | -1 | 1  | -1 | 1  | -1 | 1  | -1 | -1 | 1  | -1 | 1  | -1 | -1 | -1 | -1 | -1 | -1 | 1  | -1 | -1 | -1 | 1  | -1 |
| 22    | -1 | 1  | -1 | -1 | -1 | 1  | -1 | -1 | -1 | 1  | -1 | -1 | -1 | -1 | -1 | -1 | -1 | -1 | -1 | -1 | -1 | -1 | 1  | -1 | -1 | 1  | 1  | 1  |
| 23    | 1  | 1  | -1 | -1 | -1 | 1  | -1 | -1 | 1  | -1 | 1  | -1 | 1  | -1 | 1  | 1  | 1  | 1  | -1 | -1 | -1 | -1 | -1 | -1 | -1 | -1 | 1  | -1 |
| 24    | -1 | 1  | -1 | 1  | -1 | 1  | 1  | -1 | 1  | -1 | -1 | 1  | -1 | -1 | -1 | -1 | -1 | -1 | -1 | -1 | -1 | -1 | -1 | -1 | -1 | -1 | -1 | -1 |
| 25    | 1  | -1 | 1  | -1 | -1 | 1  | 1  | -1 | 1  | 1  | -1 | -1 | -1 | -1 | -1 | -1 | -1 | -1 | -1 | -1 | -1 | -1 | -1 | -1 | 1  | -1 | -1 | -1 |
| 26    | 1  | -1 | -1 | 1  | -1 | 1  | 1  | 1  | 1  | 1  | 1  | 1  | -1 | 1  | 1  | 1  | 1  | -1 | -1 | 1  | 1  | 1  | -1 | -1 | -1 | -1 | -1 | 1  |
| 27    | 1  | 1  | 1  | -1 | -1 | 1  | 1  | 1  | -1 | 1  | -1 | -1 | 1  | 1  | 1  | -1 | -1 | 1  | 1  | -1 | 1  | -1 | 1  | -1 | 1  | 1  | 1  | -1 |

**Supplementary Table 41:** Weights of neuron 2 in 3-class 3-bit  $28 \times 28$  image classification.

| Index | 0  | 1  | 2  | 3  | 4  | 5  | 6  | 7  | 8  | 9  | 10 | 11 | 12 | 13 | 14 | 15 | 16 | 17 | 18 | 19 | 20 | 21 | 22 | 23 | 24 | 25 | 26 | 27 |
|-------|----|----|----|----|----|----|----|----|----|----|----|----|----|----|----|----|----|----|----|----|----|----|----|----|----|----|----|----|
| 0     | 1  | -1 | -1 | -1 | -1 | -1 | 1  | -1 | -1 | 1  | 1  | -1 | 1  | -1 | -1 | -1 | 1  | -1 | -1 | -1 | -1 | -1 | -1 | -1 | 1  | 1  | -1 |    |
| 1     | 1  | 1  | 1  | 1  | 1  | -1 | -1 | 1  | 1  | 1  | -1 | -1 | -1 | -1 | 1  | -1 | 1  | 1  | 1  | -1 | 1  | -1 | -1 | -1 | -1 | -1 | 1  | 1  |
| 2     | -1 | 1  | -1 | -1 | -1 | -1 | -1 | 1  | 1  | 1  | 1  | 1  | 1  | 1  | 1  | 1  | 1  | 1  | 1  | -1 | -1 | 1  | -1 | 1  | 1  | -1 | 1  | 1  |
| 3     | 1  | 1  | -1 | -1 | -1 | 1  | 1  | -1 | -1 | 1  | 1  | 1  | 1  | 1  | 1  | 1  | 1  | 1  | 1  | 1  | -1 | 1  | 1  | 1  | 1  | 1  | 1  | -1 |
| 4     | -1 | -1 | -1 | -1 | -1 | 1  | -1 | 1  | 1  | -1 | 1  | 1  | -1 | -1 | 1  | -1 | -1 | -1 | -1 | -1 | -1 | -1 | -1 | -1 | -1 | 1  | 1  | 1  |
| 5     | -1 | -1 | -1 | -1 | -1 | 1  | -1 | -1 | 1  | 1  | 1  | 1  | 1  | 1  | -1 | 1  | 1  | 1  | 1  | 1  | -1 | -1 | -1 | -1 | -1 | 1  | -1 | 1  |
| 6     | 1  | -1 | 1  | 1  | -1 | -1 | 1  | 1  | 1  | 1  | -1 | 1  | 1  | 1  | 1  | -1 | 1  | -1 | -1 | -1 | -1 | -1 | -1 | -1 | -1 | 1  | 1  | -1 |
| 7     | 1  | 1  | 1  | 1  | 1  | 1  | -1 | -1 | 1  | -1 | 1  | -1 | -1 | -1 | 1  | -1 | -1 | -1 | -1 | -1 | -1 | -1 | 1  | 1  | -1 | -1 | 1  | -1 |
| 8     | -1 | 1  | 1  | 1  | 1  | 1  | 1  | 1  | 1  | 1  | 1  | 1  | 1  | -1 | -1 | 1  | -1 | -1 | -1 | -1 | 1  | -1 | -1 | 1  | 1  | -1 | 1  | 1  |
| 9     | 1  | -1 | 1  | 1  | 1  | 1  | 1  | -1 | 1  | 1  | 1  | 1  | -1 | 1  | -1 | -1 | -1 | -1 | -1 | -1 | 1  | 1  | 1  | 1  | 1  | -1 | 1  | 1  |
| 10    | 1  | -1 | 1  | 1  | 1  | 1  | 1  | 1  | -1 | -1 | -1 | -1 | -1 | -1 | -1 | -1 | 1  | 1  | -1 | -1 | -1 | -1 | -1 | -1 | -1 | -1 | 1  | -1 |
| 11    | -1 | -1 | -1 | 1  | 1  | 1  | -1 | -1 | 1  | -1 | -1 | -1 | -1 | -1 | -1 | -1 | -1 | -1 | -1 | -1 | 1  | -1 | -1 | -1 | -1 | -1 | 1  | -1 |
| 12    | 1  | -1 | -1 | 1  | -1 | -1 | -1 | -1 | -1 | -1 | -1 | -1 | -1 | -1 | -1 | -1 | 1  | 1  | -1 | -1 | -1 | -1 | -1 | -1 | -1 | -1 | 1  | 1  |
| 13    | -1 | -1 | -1 | 1  | -1 | -1 | -1 | -1 | -1 | -1 | -1 | 1  | -1 | -1 | -1 | -1 | 1  | 1  | -1 | 1  | -1 | -1 | -1 | -1 | -1 | 1  | 1  | 1  |
| 14    | 1  | -1 | -1 | 1  | -1 | -1 | -1 | -1 | -1 | -1 | 1  | 1  | 1  | -1 | 1  | 1  | 1  | 1  | 1  | 1  | -1 | -1 | -1 | -1 | 1  | 1  | 1  | 1  |
| 15    | 1  | 1  | -1 | 1  | -1 | -1 | -1 | -1 | -1 | -1 | 1  | 1  | 1  | 1  | 1  | 1  | 1  | 1  | 1  | 1  | 1  | 1  | -1 | -1 | 1  | 1  | 1  | 1  |
| 16    | 1  | -1 | 1  | 1  | 1  | 1  | 1  | 1  | -1 | -1 | 1  | 1  | 1  | 1  | -1 | 1  | 1  | 1  | 1  | 1  | 1  | -1 | 1  | -1 | 1  | 1  | 1  | 1  |
| 17    | -1 | 1  | 1  | 1  | 1  | 1  | 1  | 1  | 1  | 1  | 1  | 1  | 1  | 1  | 1  | -1 | 1  | 1  | 1  | 1  | -1 | 1  | -1 | -1 | 1  | 1  | 1  | 1  |
| 18    | -1 | -1 | 1  | 1  | 1  | 1  | 1  | 1  | -1 | 1  | 1  | 1  | 1  | 1  | 1  | 1  | 1  | 1  | 1  | 1  | -1 | 1  | 1  | 1  | 1  | 1  | 1  | 1  |
| 19    | -1 | -1 | 1  | 1  | 1  | 1  | 1  | 1  | 1  | 1  | 1  | 1  | 1  | 1  | -1 | 1  | 1  | 1  | 1  | 1  | 1  | 1  | 1  | -1 | 1  | 1  | 1  | 1  |
| 20    | -1 | -1 | 1  | -1 | 1  | 1  | 1  | -1 | -1 | -1 | -1 | -1 | -1 | -1 | -1 | 1  | 1  | 1  | 1  | 1  | 1  | 1  | 1  | -1 | 1  | 1  | 1  | -1 |
| 21    | 1  | -1 | 1  | 1  | 1  | 1  | 1  | 1  | 1  | -1 | 1  | -1 | 1  | 1  | 1  | 1  | 1  | 1  | 1  | 1  | 1  | 1  | 1  | 1  | 1  | -1 | 1  | -1 |
| 22    | 1  | 1  | 1  | 1  | 1  | -1 | 1  | 1  | 1  | 1  | -1 | 1  | 1  | -1 | -1 | -1 | 1  | 1  | 1  | 1  | 1  | 1  | 1  | 1  | 1  | -1 | 1  | -1 |
| 23    | 1  | -1 | 1  | 1  | 1  | 1  | 1  | -1 | 1  | -1 | 1  | -1 | -1 | -1 | -1 | -1 | 1  | 1  | 1  | 1  | 1  | 1  | 1  | 1  | 1  | 1  | -1 | 1  |
| 24    | 1  | -1 | -1 | -1 | 1  | -1 | -1 | -1 | -1 | 1  | -1 | 1  | -1 | 1  | -1 | 1  | 1  | 1  | 1  | 1  | 1  | 1  | 1  | 1  | 1  | 1  | 1  | -1 |
| 25    | 1  | 1  | -1 | 1  | 1  | -1 | 1  | 1  | -1 | -1 | 1  | 1  | 1  | 1  | 1  | 1  | 1  | 1  | 1  | 1  | 1  | 1  | 1  | -1 | 1  | 1  | 1  | 1  |
| 26    | -1 | 1  | 1  | -1 | -1 | -1 | -1 | -1 | -1 | -1 | 1  | -1 | -1 | -1 | -1 | -1 | -1 | 1  | -1 | -1 | 1  | 1  | -1 | -1 | 1  | 1  | 1  | -1 |
| 27    | 1  | -1 | 1  | 1  | -1 | -1 | -1 | -1 | 1  | -1 | -1 | 1  | 1  | 1  | -1 | 1  | -1 | -1 | 1  | -1 | -1 | -1 | -1 | 1  | -1 | 1  | -1 | 1  |

## Supplementary References

- [1] M. Alistar and U. Gaudenz, “Opendrop: An integrated do-it-yourself platform for personal use of biochips,” *Bioengineering*, vol. 4, no. 2, p. 45, 2017.
