# Supplementary material for: Digital circuits and neural networks based on acid-base chemistry implemented by robotic fluid handling
Source: PubMed Central journal article supplement (PMC9887006; doi:10.1038/s41467-023-36206-8), 2023-01-30
Supplement: 41467_2023_36206_MOESM3_ESM.pdf [file 41467_2023_36206_MOESM3_ESM.pdf]

## **Description of Additional Supplementary Files**

**Supplementary Movie 1** – Classification of 8x8 Image.mp4: Walkthrough of running the 8x8 image classification using the acid-base model.

**Supplementary Movie 2** – AND Gate on microfluidic board.mp4: Demonstrating AND-gate implementation on a the microfluidic board OpenDrop v4.
